# Supplementary material for: Ψ[CH(CF3)NH]Gly-peptides: synthesis and conformation analysis
Source: Royal Society of Chemistry journal article supplement (doi:10.1039/b901718f), 2009-01-01
Supplement: b901718f.pdf [file b901718f.pdf]

## Supporting Information

# $\Psi$ [CH(CF<sub>3</sub>)NH]Gly-Peptides: Synthesis and Conformation Analysis

Marco Molteni, Maria Cristina Bellucci, Serena Bigotti, Stefania Mazzini, Alessandro Volonterio,\*  
Matteo Zanda\*

*Dipartimento di Chimica, Materiali ed Ingegneria Chimica "G. Natta" del Politecnico di Milano,  
via Mancinelli 7, I-20131 Milano, Italy, and C.N.R.- Istituto di Chimica del Riconoscimento  
Molecolare, Sezione "A. Quilico", via Mancinelli 7, I-20131 Milano, Italy.*

[alessandro.volonterio@polimi.it](mailto:alessandro.volonterio@polimi.it); [matteo.zanda@polimi.it](mailto:matteo.zanda@polimi.it);

**Table of Contents:**

- Pages 3-6 Characterization of Michael adducts **4** and **5**, tripeptides **8**, and tetrapeptides **12-14**.
- Pages 7-25  $^1\text{H}$  NMR and  $^{13}\text{C}$  NMR spectra of Michael adducts **4**, tripeptides **8**, intermediates **17a,b**, **18**, **19** and final tetrapeptides **11-14**.
- Pages 26-27 2D ROESY and  $^1\text{H}$ - $^{13}\text{C}$  2D HMBC of **11**.
- Pages 28-29 2D ROESY of **12**.
- Pages 30-31 2D ROESY and  $^1\text{H}$ - $^{13}\text{C}$  2D HMBC of **13**.

**4a:**  $[\alpha]_D^{23} = -17.2^\circ$  ( $c = 1.2$ ,  $\text{CHCl}_3$ ); FT IR (film):  $\nu_{\text{max}} = 3363, 2966, 1732, 1566, 1382 \text{ cm}^{-1}$ ;  $^1\text{H}$  NMR (500 MHz,  $\text{CDCl}_3$ ):  $\delta = 7.41\text{-}7.33$  (m, 5H), 5.18 (d,  $J = 12.2$  Hz, 1H), 5.15 (d,  $J = 12.2$  Hz, 1H), 4.64 (dd,  $J = 13.5, 4.3$  Hz, 1H), 4.52 (dd,  $J = 13.5, 7.5$  Hz, 1H), 3.91 (m, 1H), 3.32 (d,  $J = 5.3$  Hz, 1H), 2.04 (m, 1H), 1.94 (br s, 1H), 0.97 (d,  $J = 6.5$  Hz, 3H), 0.87 (d,  $J = 6.5$  Hz, 3H);  $^{19}\text{F}$  NMR (470.6 MHz,  $\text{CDCl}_3$ ):  $\delta = -75.8$  (d,  $J = 7.7$  Hz);  $^{13}\text{C}$  NMR (125.7 MHz,  $\text{CDCl}_3$ ):  $\delta = 174.1, 135.4, 128.62, 128.60, 128.5, 124.5$  (q,  $J = 281.7$  Hz), 74.3, 67.1, 66.6, 58.29 (q,  $J = 29.8$  Hz), 31.9, 19.1, 17.3; MS (70 eV):  $e/z$  (%): 349 [ $\text{M}^+ + 1$ ] (20), 213 (100), 91 (40).

**4b:**  $[\alpha]_D^{23} = -12.9^\circ$  ( $c = 1.8$ ,  $\text{CHCl}_3$ ); FT IR (film):  $\nu_{\text{max}} = 3362, 2972, 2930, 1716, 1567 \text{ cm}^{-1}$ ;  $^1\text{H}$  NMR (250 MHz,  $\text{CDCl}_3$ ):  $\delta = 4.67$  (dd,  $J = 13.9, 4.2$  Hz, 1H), 4.57 (dd,  $J = 13.9, 7.4$  Hz, 1H), 3.88 (m, 1H), 3.14 (d, 4.9 Hz, 1H), 1.98 (m, 1H), 1.95 (br s, 1H), 1.46 (s, 9H), 0.97 (d,  $J = 6.7$  Hz, 3H), 0.87 (d,  $J = 6.7$  Hz, 3H);  $^{19}\text{F}$  NMR (235.4 MHz,  $\text{CDCl}_3$ ):  $\delta = -76.4$  (d,  $J = 6.9$  Hz, 3F);  $^{13}\text{C}$  NMR (62.9 MHz,  $\text{CDCl}_3$ ):  $\delta = 173.4, 124.6$  (q,  $J = 282.3$  Hz), 81.9, 74.4, 66.9, 58.5 (q,  $J = 29.7$  Hz), 31.9, 27.8, 19.0, 17.1.

**4c:**  $[\alpha]_D^{23} = -24.0^\circ$  ( $c = 1.6$ ,  $\text{CHCl}_3$ ); FT IR (film):  $\nu_{\text{max}} = 3360, 2980, 2936, 1728, 1642, 1567, 1382 \text{ cm}^{-1}$ ;  $^1\text{H}$  NMR (250 MHz,  $\text{CDCl}_3$ ):  $\delta = 4.67$  (dd,  $J = 13.3, 4.9$  Hz, 1H), 4.59 (dd,  $J = 13.3, 7.5$  Hz, 1H), 3.95 (m, 1H), 3.47 (q,  $J = 6.9$  Hz, 1H), 2.00 (br s, 1H), 1.45 (s, 9H), 1.30 (d,  $J = 6.9$  Hz, 3H);  $^{19}\text{F}$  NMR (235.4 MHz,  $\text{CDCl}_3$ ):  $\delta = -76.3$  (d,  $J = 7.3$  Hz, 3F);  $^{13}\text{C}$  NMR (62.9 MHz,  $\text{CDCl}_3$ ):  $\delta = 173.9, 124.7$  (q,  $J = 282.2$  Hz), 82.0, 74.4, 57.3 (q,  $J = 29.7$  Hz), 56.7, 27.9, 19.7; MS (70 eV):  $e/z$  (%): 287 [ $\text{M}^+ + 1$ ] (1), 185 (100).

**4e:**  $[\alpha]_D^{23} = -14.1^\circ$  ( $c = 1.2$ ,  $\text{CHCl}_3$ ); FT IR (film):  $\nu_{\text{max}} = 3355, 2932, 1725, 1570, 1370, 1153 \text{ cm}^{-1}$ ;  $^1\text{H}$  NMR (400 MHz,  $\text{CDCl}_3$ ):  $\delta = 7.33\text{-}7.17$  (m, 5H), 4.60 (dd,  $J = 13.3, 4.7$  Hz, 1H), 4.47 (dd,  $J = 13.3, 7.7$  Hz, 1H), 3.95 (m, 1H), 3.65 (dd,  $J = 7.2, 6.1$  Hz, 1H), 2.98 (dd,  $J = 13.5, 6.1$  Hz, 1H), 2.88 (dd,  $J = 13.5, 7.2$  Hz, 1H), 1.83 (br s, 1H), 1.40 (s, 9H);  $^{19}\text{F}$  NMR (470.6 MHz,  $\text{CDCl}_3$ ):  $\delta = -76.0$  (d,  $J = 7.3$  Hz, 3F);  $^{13}\text{C}$  NMR (62.9 MHz,  $\text{CDCl}_3$ ):  $\delta = 172.6, 136.4, 129.4, 128.4, 126.9, 124.5$  (q,  $J = 281.0$  Hz), 82.3, 74.2, 61.9, 57.6 (q,  $J = 29.3$  Hz), 40.1, 27.8.

**4g:**  $[\alpha]_D^{23} = +13.8^\circ$  ( $c = 1.2$ ,  $\text{CHCl}_3$ ); FT IR (film):  $\nu_{\text{max}} = 3359, 2957, 1740, 1563, 1382, 1267, 1030 \text{ cm}^{-1}$ ;  $^1\text{H}$  NMR (250 MHz,  $\text{CDCl}_3$ ):  $\delta = 7.33\text{-}7.15$  (m, 5H), 4.60 (dd,  $J = 13.1, 4.3$  Hz, 1H), 4.44 (dd,  $J = 13.1, 8.14$  Hz, 1H), 3.95 (m, 1H), 3.79 (dd,  $J = 7.4, 5.3$  Hz, 1H), 3.70 (s, 3H), 3.06

(dd,  $J = 13.5, 5.3$  Hz, 1H), 2.90 (dd,  $J = 13.5, 7.4$  Hz, 1H), 1.86 (br s, 1H);  $^{19}\text{F}$  NMR (235.4 MHz,  $\text{CDCl}_3$ ):  $\delta = -76.1$  (d,  $J = 6.9$  Hz);  $^{13}\text{C}$  NMR (62.9 MHz,  $\text{CDCl}_3$ ):  $\delta = 173.6, 136.0, 129.2, 128.6, 127.1, 124.1$  (q,  $J = 283.3$  Hz), 74.3, 61.4, 57.5 (q,  $J = 29.7$  Hz), 52.3, 39.6; MS (70 eV):  $e/z$  (%): 321 [ $\text{M}^+ + 1$ ] (20), 261 (98), 229 (100), 91 (35).

**5a:**  $[\alpha]_{\text{D}}^{23} = +22.9^\circ$  ( $c = 1.0$ ,  $\text{CHCl}_3$ ); FT IR (film):  $\nu_{\text{max}} = 3345, 2967, 2919, 1733, 1567, 1382$   $\text{cm}^{-1}$ ;  $^1\text{H}$  NMR (500 MHz,  $\text{CDCl}_3$ ):  $\delta = 7.41\text{--}7.31$  (m, 5H), 5.15 (s, 2H), 4.59 (dd,  $J = 12.9, 3.6$  Hz, 1H), 4.40 (dd,  $J = 12.9, 10.1$  Hz, 1H), 3.94 (m, 1H), 3.20 (d,  $J = 4.6$  Hz, 1H), 2.20 (br s, 1H), 1.90 (m, 1H), 0.86 (d,  $J = 6.5$  Hz, 3H), 0.80 (d,  $J = 6.5$  Hz, 3H);  $^{19}\text{F}$  NMR (470.6 MHz,  $\text{CDCl}_3$ ):  $\delta = -74.8$  (d,  $J = 7.6$  Hz);  $^{13}\text{C}$  NMR (62.9 MHz,  $\text{CDCl}_3$ ):  $\delta = 173.5, 135.4, 128.6, 124.7$  (q,  $J = 285.5$  Hz), 74.7, 67.1, 66.3, 59.4 (q,  $J = 29.5$  Hz), 32.7, 19.0, 17.2; MS (70 eV):  $e/z$  (%): 349 [ $\text{M}^+ + 1$ ] (20), 213 (100), 91 (40).

**5b:** this diastereoisomer was not isolated in analytically pure form;  $^{19}\text{F}$  NMR (235.4 MHz  $\text{CDCl}_3$ ):  $\delta = -75.1$  (d,  $J = 7.0$  Hz).

**5c:**  $[\alpha]_{\text{D}}^{23} = +19.0^\circ$  ( $c = 1.3$ ,  $\text{CHCl}_3$ ); FT IR (film):  $\nu_{\text{max}} = 3340, 2969, 1722, 1570, 1371, 1124$   $\text{cm}^{-1}$ ;  $^1\text{H}$  NMR (250 MHz,  $\text{CDCl}_3$ ):  $\delta = 4.62$  (dd,  $J = 13.1, 3.9$  Hz, 1H), 4.41 (dd,  $J = 13.1, 9.3$  Hz, 1H), 4.03 (m, 1H), 3.40 (q,  $J = 6.8$  Hz, 1H), 2.27 (br s, 1H), 1.46 (s, 9H), 1.23 (d,  $J = 6.8$  Hz, 3H);  $^{19}\text{F}$  NMR (235.4 MHz,  $\text{CDCl}_3$ ):  $\delta = -75.1$  (d,  $J = 7.2$  Hz);  $^{13}\text{C}$  NMR (62.9 MHz,  $\text{CDCl}_3$ ):  $\delta = 173.4, 124.5$  (q,  $J = 284.5$  Hz), 81.9, 74.7, 57.4 (q,  $J = 29.5$  Hz), 55.8, 27.9, 19.8; MS (70 eV):  $e/z$  (%): 287 [ $\text{M}^+ + 1$ ] (1), 185 (100), 57 (30).

**5e:** this diastereoisomer was not isolated in analytically pure form.  $^{19}\text{F}$  NMR (470.6 MHz,  $\text{CDCl}_3$ ):  $\delta = -74.6$  (d,  $J = 7.3$  Hz).

**5g:**  $[\alpha]_{\text{D}}^{23} = -35.5^\circ$  ( $c = 0.6$ ,  $\text{CHCl}_3$ ); FT IR (film):  $\nu_{\text{max}} = 2956, 3354, 2924, 1736, 1566, 1382$   $\text{cm}^{-1}$ ;  $^1\text{H}$  NMR (250 MHz,  $\text{CDCl}_3$ ):  $\delta = 7.30$  (m, 3H), 7.10 (m, 2H), 4.51 (dd,  $J = 13.1, 4.2$  Hz, 1H), 4.29 (dd,  $J = 13.1, 9.2$  Hz, 1H), 3.91 (m, 1H), 3.70 (s, 3H), 3.65 (dd,  $J = 6.9, 5.4$  Hz, 1H), 2.95 (dd,  $J = 13.5, 5.4$  Hz, 1H), 2.81 (dd,  $J = 13.5, 6.9$  Hz, 1H), 2.03 (br s, 1H);  $^{19}\text{F}$  NMR (235.4 MHz,  $\text{CDCl}_3$ ):  $\delta = -75.3$  (d,  $J = 6.6$  Hz);  $^{13}\text{C}$  NMR (62.9 MHz,  $\text{CDCl}_3$ ):  $\delta = 173.6, 136.3, 129.3, 128.5, 127.0, 124.7$  (q,  $J = 283.9$  Hz), 74.4, 61.9, 58.5 (q,  $J = 29.5$  Hz), 40.7; MS (70 eV):  $e/z$  (%): 321 [ $\text{M}^+ + 1$ ] (38), 261 (85), 229 (100), 91 (38).

**8b:**  $[\alpha]_D^{23} = -8.5^\circ$  ( $c = 2.7$ ,  $\text{CH}_3\text{COCH}_3$ ); FT IR (microscope):  $\nu_{\text{max}} = 3300, 2956, 2924, 1724, 1687, 1654, 1539, 1368 \text{ cm}^{-1}$ ;  $^1\text{H}$  NMR: (250 MHz,  $\text{CD}_3\text{COCD}_3$ ):  $\delta = 7.69$  (br s, 1H), 7.36-7.16 (m, 10H), 6.40 (br d,  $J = 8.3$  Hz, 1H), 5.05 (d,  $J = 12.8$  Hz, 1H), 4.95 (d,  $J = 12.8$  Hz, 1H), 4.49 (m, 1H), 3.49 (m, 2H), 3.29 (dd,  $J = 13.7, 5.1$  Hz, 1H), 3.21 (m, 1H), 3.16 (d,  $J = 4.2$  Hz, 1H), 2.98 (m, 1H), 2.36 (br s, 1H), 1.97 (m, 1H), 1.47 (s, 9H), 0.98 (d,  $J = 6.5$ , 3H), 0.89 (d,  $J = 6.5$  Hz, 3H);  $^{19}\text{F}$  NMR: (235.4 MHz,  $\text{CDCl}_3$ ):  $\delta = -74.0$  (d,  $J = 6.9$  Hz);  $^{13}\text{C}$  NMR (62.9 MHz,  $\text{CD}_3\text{COCD}_3$ ):  $\delta = 175.9, 173.7, 157.4, 139.6, 138.7, 130.9, 129.8, 129.7, 129.2, 129.1, 127.9, 127.8$  (q,  $J = 282.7$  Hz), 82.6, 67.9, 67.3, 60.6 (q,  $J = 27.7$  Hz), 58.0, 39.3, 33.0, 29.0, 20.4, 18.6; MS (70 eV):  $e/z$  (%): 566  $[\text{M}^+ + 1]$  (60), 464 (30), 91 (100).

**8d:**  $[\alpha]_D^{23} = -12.2^\circ$  ( $c = 1.8$ ,  $\text{CH}_3\text{COCH}_3$ ); FT IR (film):  $\nu_{\text{max}} = 3305, 2966, 1735, 1688, 1656, 1540, 1382 \text{ cm}^{-1}$ ;  $^1\text{H}$  NMR: (400 MHz,  $\text{CD}_3\text{COCD}_3$ ):  $\delta = 7.69$  (br s, 1H), 7.36-7.17 (m, 10H), 6.44 (m, 1H), 5.06 (d,  $J = 12.5$  Hz, 1H), 4.98 (d,  $J = 12.5$  Hz, 1H), 4.52 (m, 1H), 3.69 (s, 3H), 3.49 (m, 2H), 3.30 (m, 2H), 3.21 (m, 1H), 3.0 (m, 1H), 2.44 (br s, 1H), 1.71 (m, 1H), 1.53 (m, 1H), 1.21 (m, 1H), 0.92 (d,  $J = 6.7$  Hz), 0.88 (t,  $J = 7.6$  Hz);  $^{19}\text{F}$  NMR: (235.4 MHz,  $\text{CD}_3\text{COCD}_3$ ):  $\delta = -74.2$  (d,  $J = 7.3$  Hz);  $^{13}\text{C}$  NMR (62.9 MHz,  $\text{CD}_3\text{COCD}_3$ ):  $\delta = 176.2, 173.2, 156.8, 138.8, 138.0, 130.2, 129.1, 129.0, 128.5, 128.4, 127.2, 127.1$  (q,  $J = 281.5$  Hz), 66.6, 66.3, 59.8 (q,  $J = 27.6$  Hz), 57.4, 52.1, 39.2, 38.7, 25.6, 16.1, 11.7; MS (70 eV):  $e/z$  (%): 538  $[\text{M}^+ + 1]$  (60), 478 (90), 91 (100).

**8g:**  $[\alpha]_D^{23} = -11.6^\circ$  ( $c = 0.4$ ,  $\text{CH}_3\text{COCH}_3$ ); FT IR (film):  $\nu_{\text{max}} = 3324, 2952, 1731, 1648, 1654, 1531, 1263, 1171 \text{ cm}^{-1}$ ;  $^1\text{H}$  NMR: (400 MHz,  $\text{CD}_3\text{COCD}_3$ ):  $\delta = 7.55$  (br s, 1H), 7.23 (m, 15H), 6.36 (br d,  $J = 7.0$  Hz, 1H), 5.03 (d,  $J = 12.6$  Hz, 1H), 4.97 (d,  $J = 12.6$  Hz, 1H), 4.44 (m, 1H), 3.74 (m, 1H), 3.63 (s, 3H), 3.52 (m, 1H), 3.32 (m, 2H), 3.21 (dd,  $J = 14.0, 5.0$  Hz, 1H), 2.93 (m, 3H), 2.41 (br d,  $J = 8.2$  Hz, 1H);  $^{19}\text{F}$  NMR: (235.4 MHz,  $\text{CD}_3\text{COCD}_3$ ):  $\delta = -74.2$  (d,  $J = 7.2$  Hz);  $^{13}\text{C}$  NMR (62.9 MHz,  $\text{CD}_3\text{COCD}_3$ ):  $\delta = 176.1, 173.6, 157.5, 139.5, 138.9, 138.7, 130.8, 130.7, 129.8, 129.7, 129.6, 129.2, 129.1, 128.0, 127.9, 67.3, 63.5, 59.8$  (q,  $J = 28.1$  Hz), 58.0, 52.9, 41.0, 39.3; the  $\text{CF}_3$  signal was obscured due to its low intensity.

**12:**  $[\alpha]_D^{23} = +4.4$  ( $c = 1.6$ ,  $\text{CHCl}_3$ ); FT IR (film):  $\nu_{\text{max}} = 3453, 1634, 1543, 1437, 1262, 1131, 754 \text{ cm}^{-1}$ ;  $^1\text{H}$  NMR (400 MHz,  $\text{CDCl}_3$ ):  $\delta = 7.44$  (br t,  $J = 4.0$  Hz, 1H), 6.91 (br d,  $J = 8.0$  Hz, 1H), 4.49 (m, 2H), 3.82 (m, 1H), 3.71 (dd,  $J = 12.0, 4.0$  Hz, 1H), 3.55 (m, 1H), 3.41 (m, 2H), 3.17 (m, 1H), 3.02 (s, 3H), 2.95 (s, 3H), 2.40 (br s, 1H), 2.28 (m, 1H), 2.19-1.90 (overlap, 8H), 1.47 (ddd,  $J =$

13.6, 9.4, 4.2 Hz, 1H), 1.23(ddd,  $J = 13.6, 8.7, 4.2$  Hz, 1H), 0.97 (m, 12H);  $^{13}\text{C}$  NMR (62.3 MHz,  $\text{CDCl}_3$ ):  $\delta = 172.0, 171.5, 170.8, 60.4, 58.01(\text{q}, J = 26.7$  Hz), 56.4, 55.5, 47.5, 42.6, 37.8, 36.8, 36.0, 30.5, 29.7, 28.3, 24.7, 24.4, 23.4, 22.8, 21.8, 19.6, 18.4;  $^{19}\text{F}$  NMR (235.3 MHz,  $\text{CDCl}_3$ ):  $\delta = -74.2$  (br s). MS (70 eV):  $e/z$  (%): 508[ $\text{M}^+ + 1$ ] (20), 435 (38), 294 (80), 84 (80), 70 (100), 43 (40). The  $\text{CF}_3$  signal was obscured due to its low intensity.

**13**:  $[\alpha]_{\text{D}}^{23} = -47.1^\circ$  ( $c = 0.7$ ,  $\text{CHCl}_3$ ); FT IR (film):  $\nu_{\text{max}} = 3411, 2960, 1634, 1543, 1431, 1262$ ,  $\text{cm}^{-1}$ ;  $^1\text{H}$ NMR (400 MHz,  $\text{CDCl}_3$ ):  $\delta = 7.02$  (br t,  $J = 5.6$  Hz, 1H), 6.23 (br d,  $J = 8.8$  Hz, 1H), 4.61 (m, 1H), 4.40 (m, 1H), 3.78 (m, 2H), 3.58 (m, 2H), 3.21 (m, 2H), 3.03 (s, 3H), 2.96 (s, 3H), 2.30 (m, 2H), 2.20 (m, 1H), 2.10 (m, 2H), 2.00 (s, 3H), 1.87 (m, 1H), 1.39(ddd,  $J = 13.6, 9.5, 4.8$  Hz, 1H), 1.27 (ddd,  $J = 13.6, 8.9, 4.1$  Hz, 1H), 0.96 (m, 13H);  $^{13}\text{C}$  NMR (150.9 MHz,  $\text{CDCl}_3$ ):  $\delta = 175.0, 172.3, 171.9, 60.7, 58.63$  (q,  $J = 26.8$  Hz), 55.8, 54.2, 48.0, 43.8, 38.0, 37.0, 36.3, 31.8, 30.0, 28.3, 25.4, 24.9, 23.9, 23.6, 22.1, 19.7, 18.0;  $^{19}\text{F}$  NMR (235.3 MHz,  $\text{CDCl}_3$ ):  $\delta = -74.3$  (br s); MS (70 eV):  $e/z$  (%): 508 [ $\text{M}^+ + 1$ ] (10), 367 (30), 294 (98), 70 (100).

**14**:  $[\alpha]_{\text{D}}^{23} = +10.4^\circ$  ( $c = 1.2$ ,  $\text{CHCl}_3$ ); FT IR (film):  $\nu_{\text{max}} = 3411, 2960, 1634, 1543, 1431, 1262$ ,  $\text{cm}^{-1}$ ;  $^1\text{H}$ NMR (400 MHz,  $\text{CDCl}_3$ ):  $\delta = 7.89$  (br s, 1H), 6.42(d,  $J = 8.7$  Hz, 1H), 4.60(dd,  $J = 7.8, 6.1$  Hz, 1H), 4.46(dd,  $J = 7.5, 2.6$  Hz, 1H), 4.00(m, 1H), 3.75(dd,  $J = 10.5, 2.7$  Hz, 1H), 2.98(s, 3H), 2.95(s, 3H), 2.89(m, 1H), 2.00(m, 10H), 1.21 (m, 2H), 0.92 (m, 12H);  $^{13}\text{C}$  NMR (62.3 MHz,  $\text{CDCl}_3$ ):  $\delta = 174.7, 172.3, 171.3, 170.0, 125.5(\text{Q}, J = 283.8$  Hz), 60.9, 57.7(q,  $J = 27.6$  Hz), 56.1, 47.4, 42.3, 38.5, 36.7, 36.3, 31.0, 29.5, 24.5, 24.4, 23.6, 21.0, 19.7, 17.7;  $^{19}\text{F}$  NMR (235.3 MHz,  $\text{CDCl}_3$ ):  $\delta = -74.2$  (br s). MS (70 eV):  $e/z$  (%): 508[ $\text{M}^+ + 1$ ] (20), 435 (35), 367(40), 294 (80), 70 (100), 43 (20).

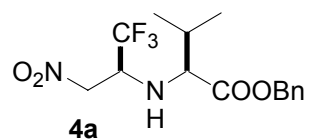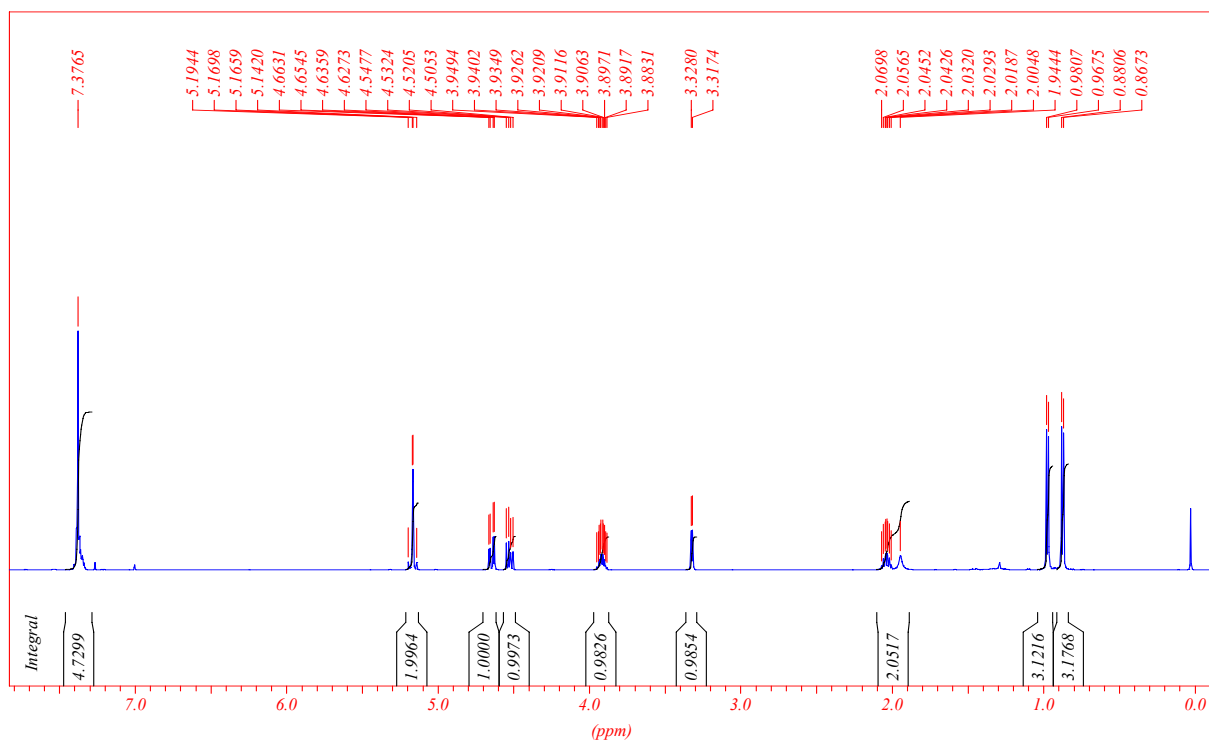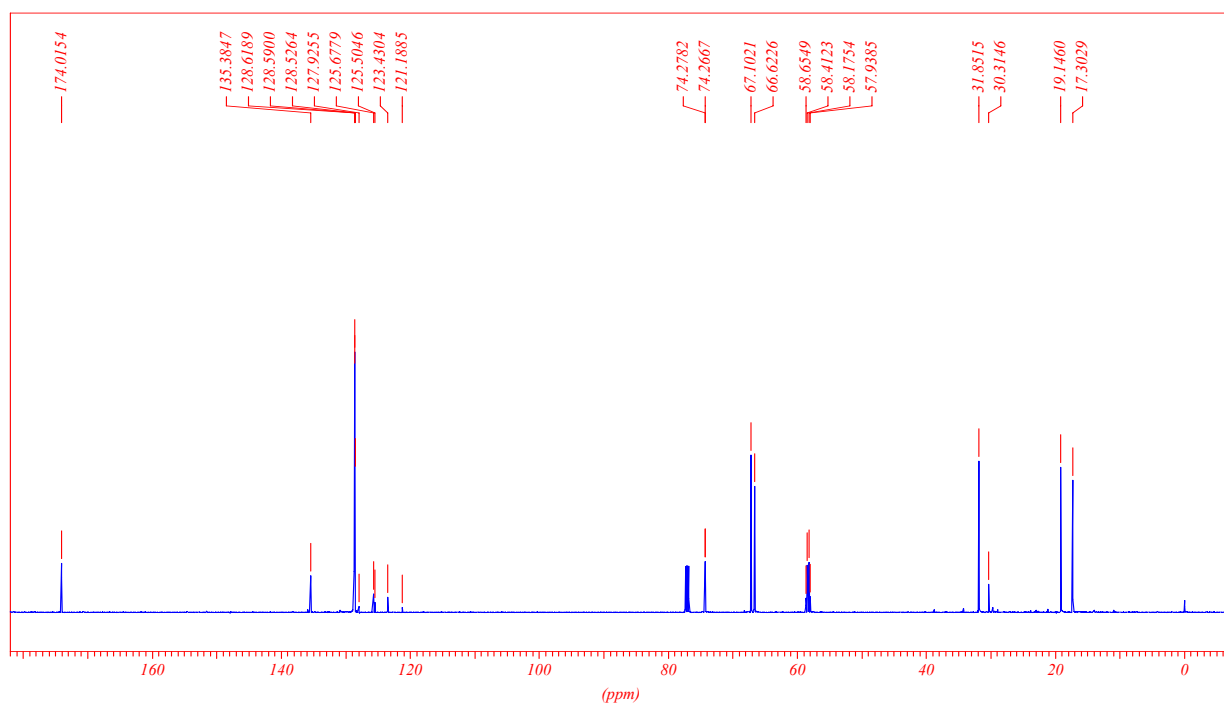

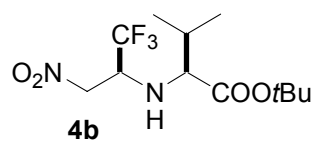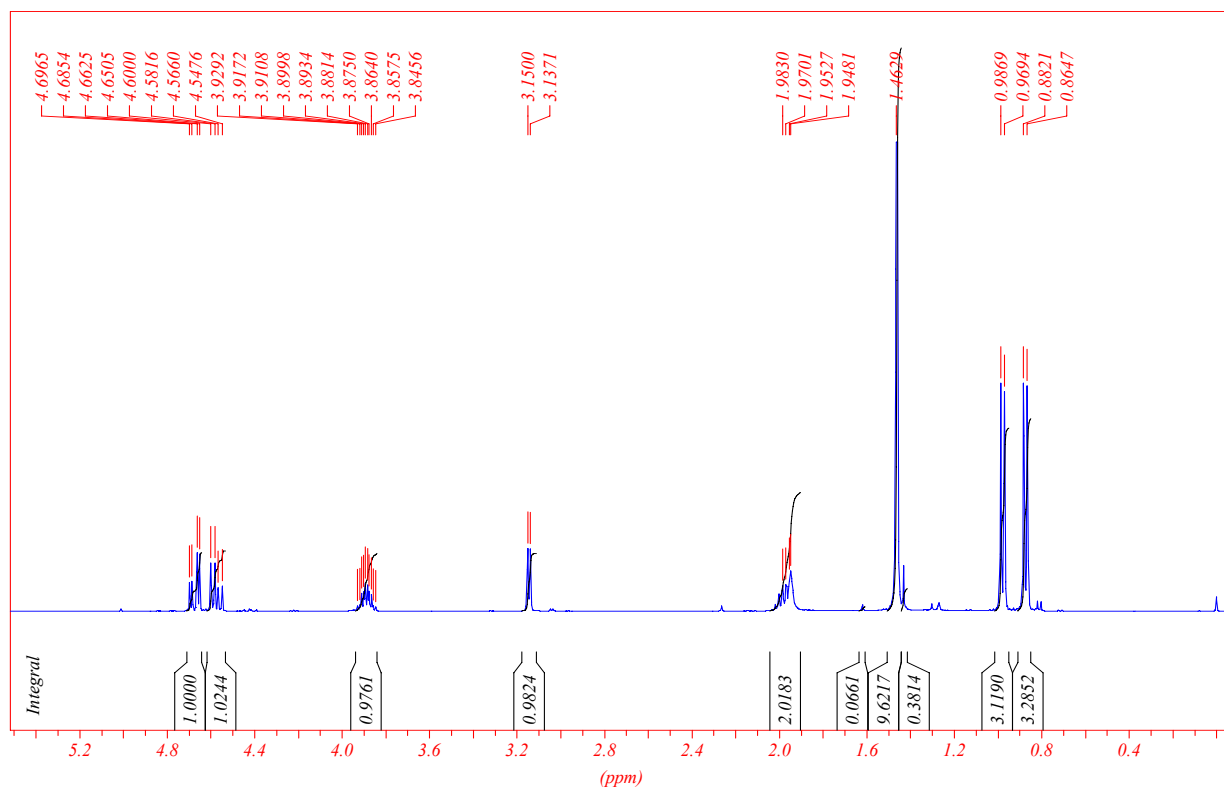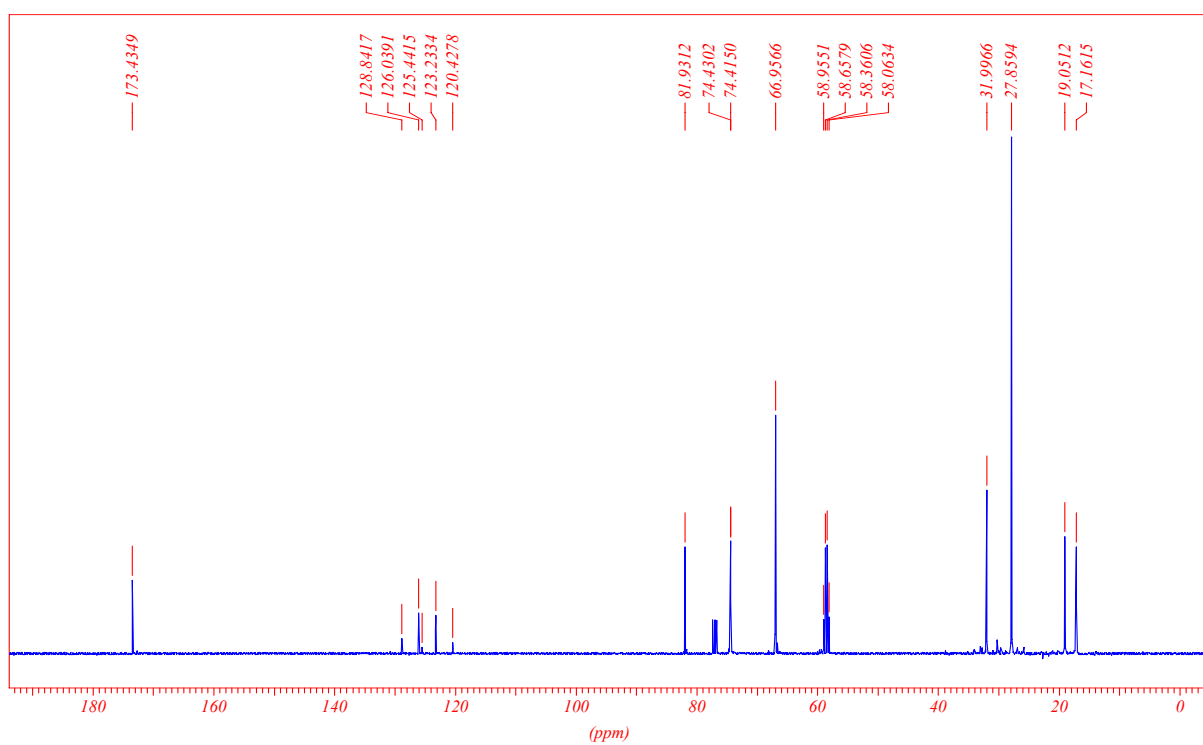



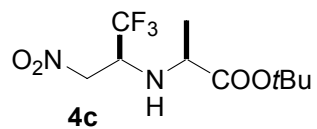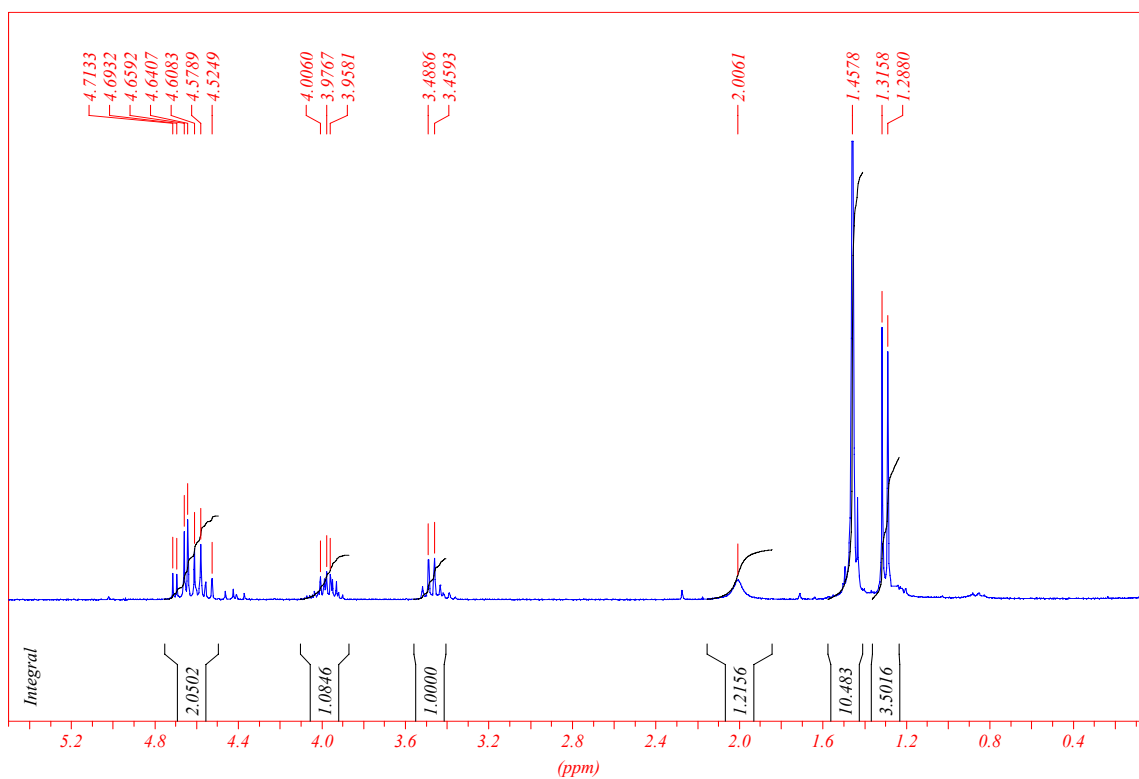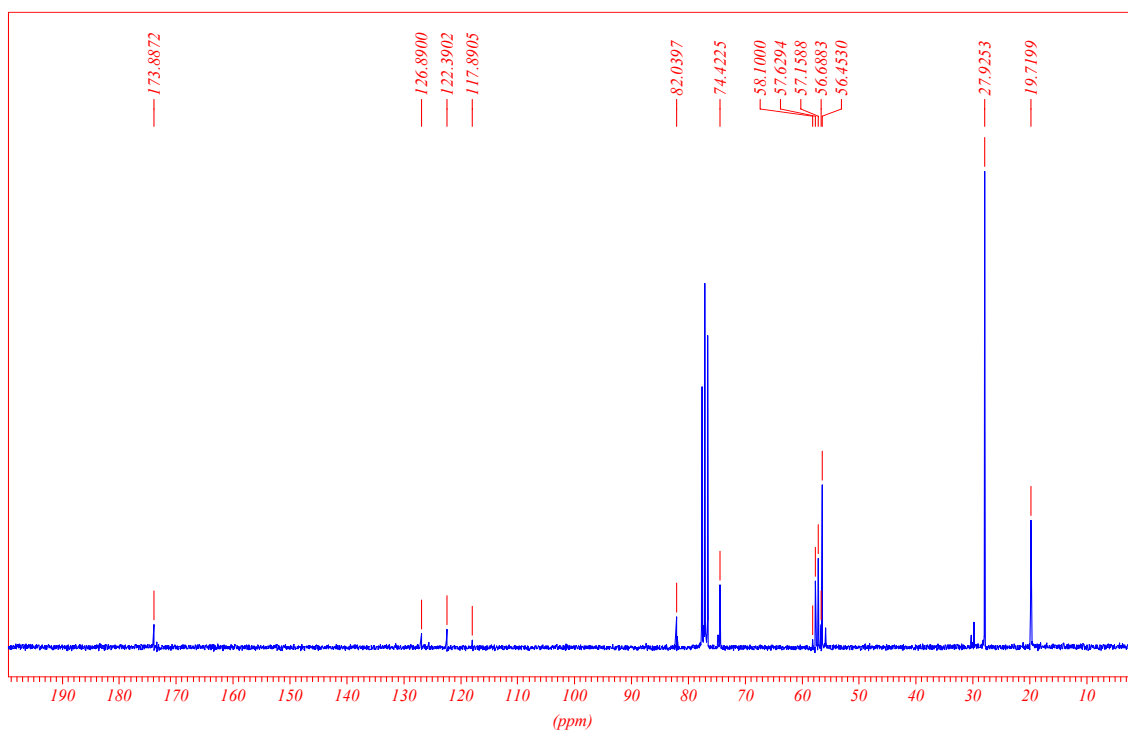

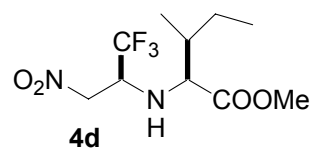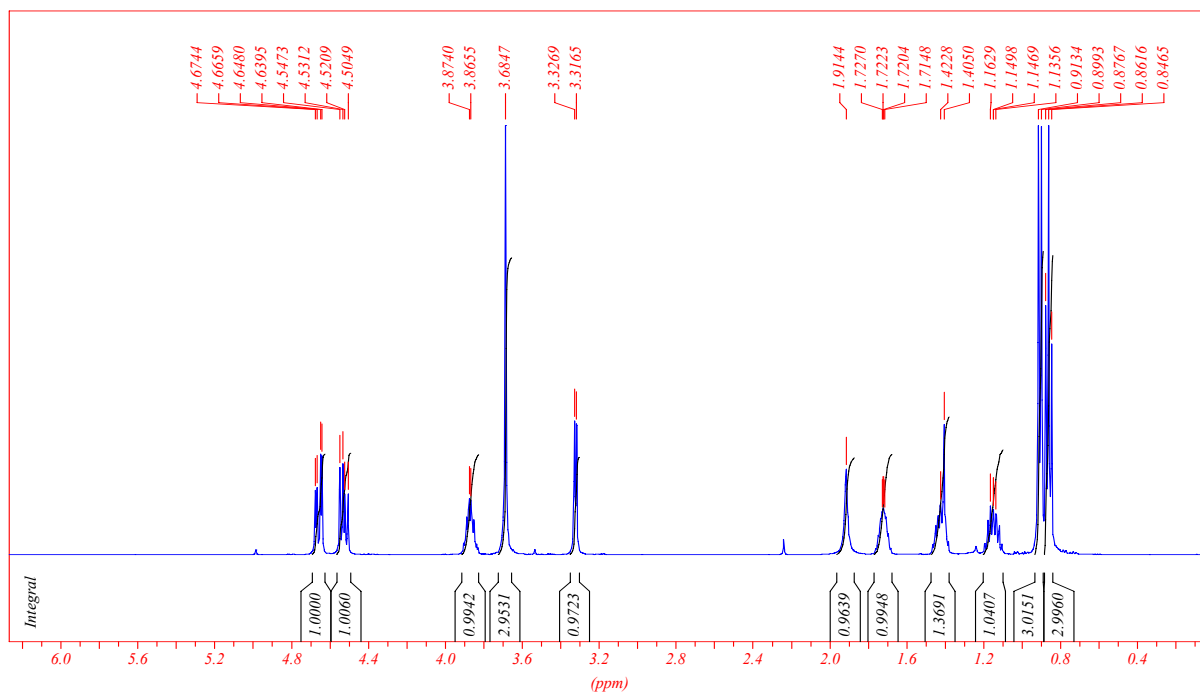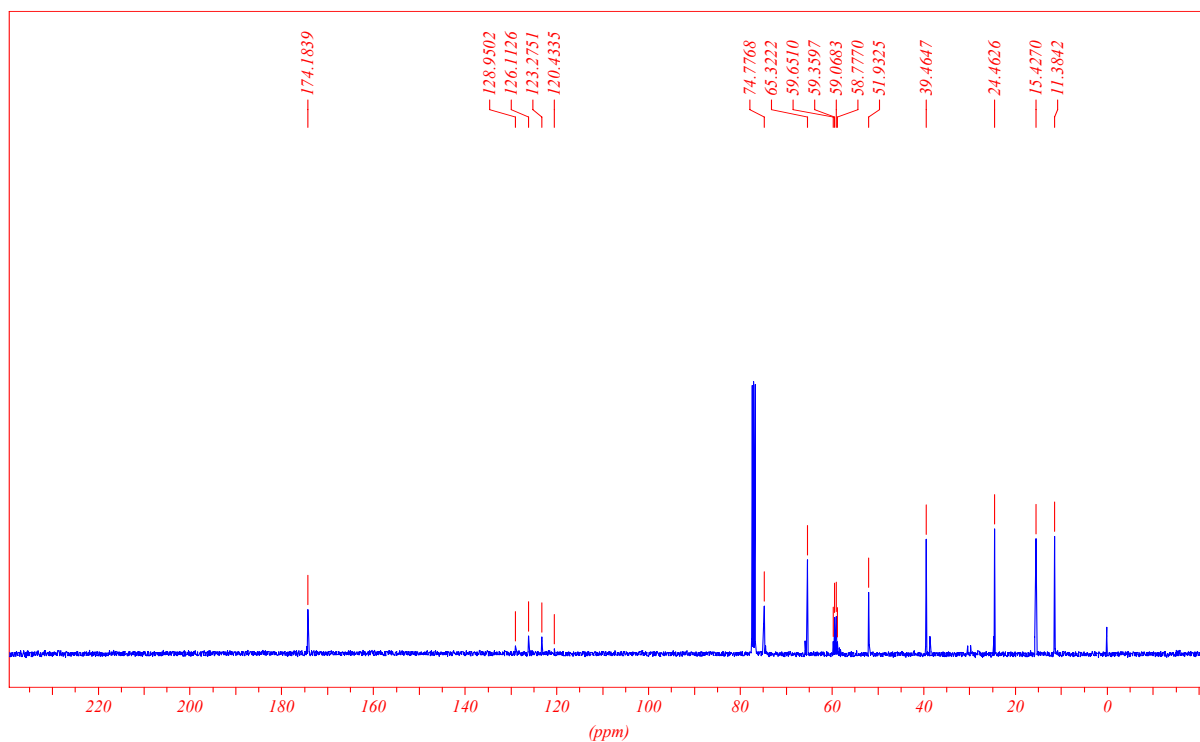

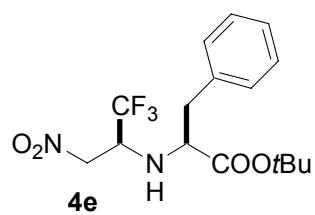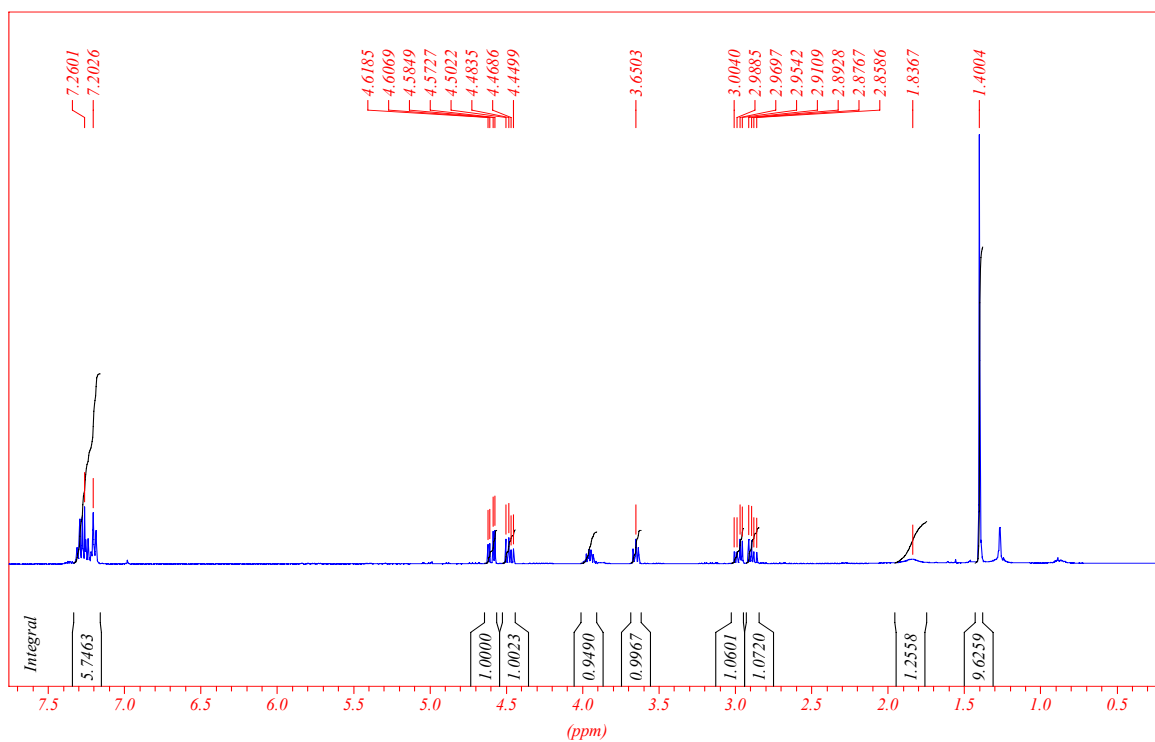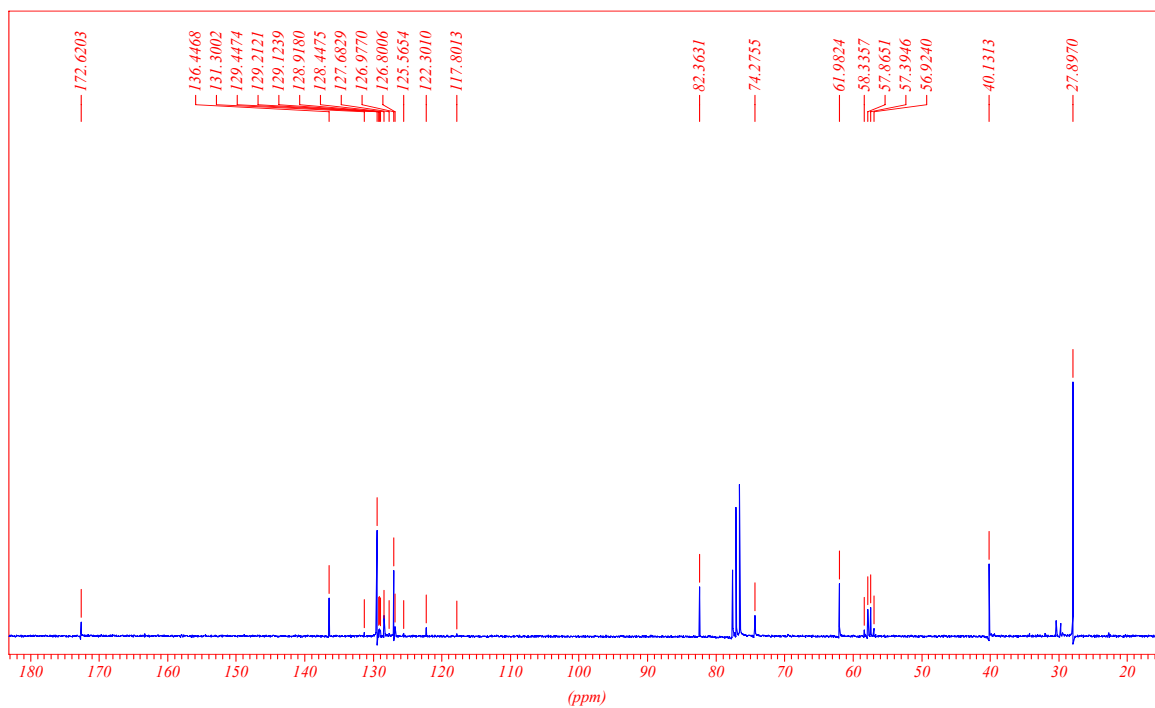

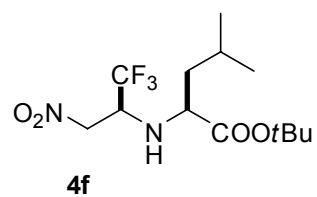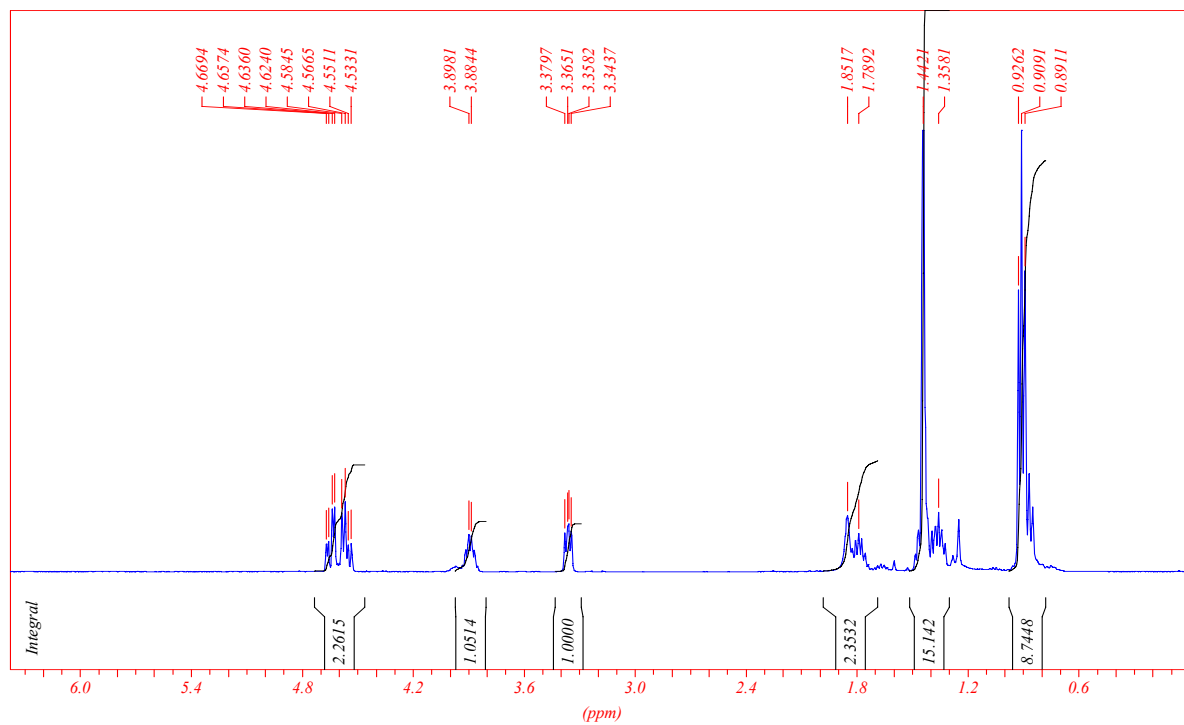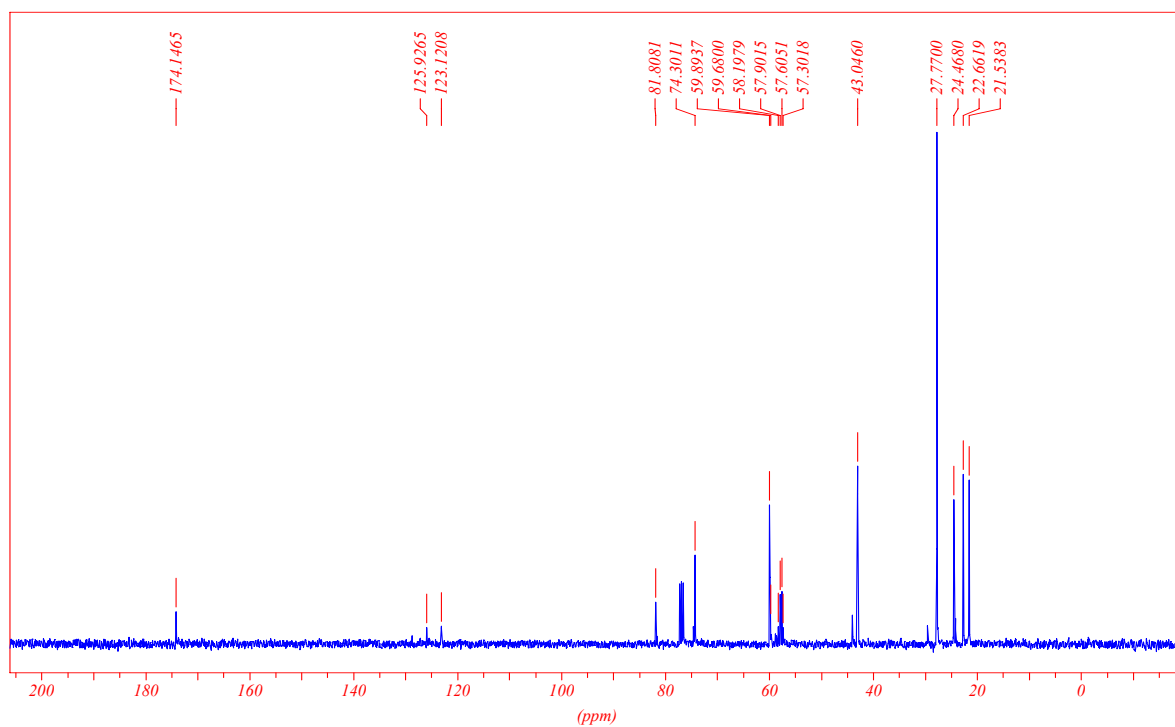

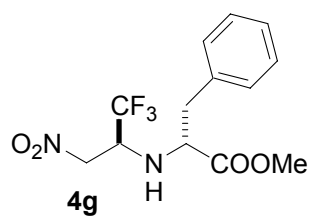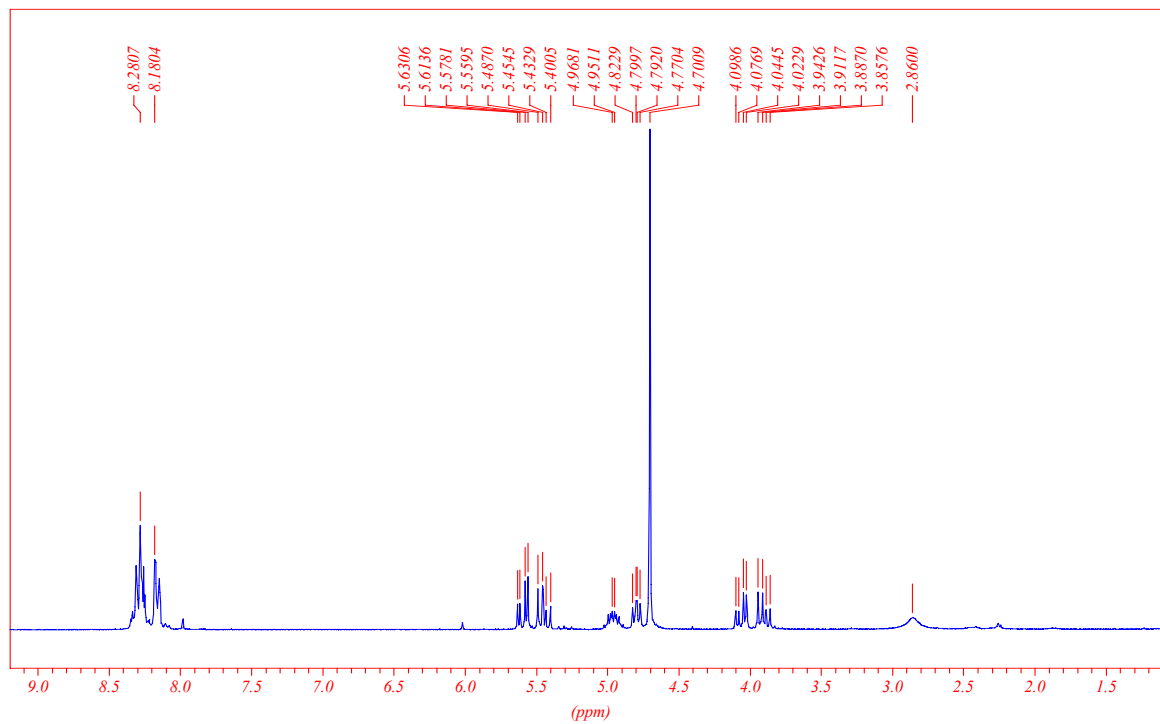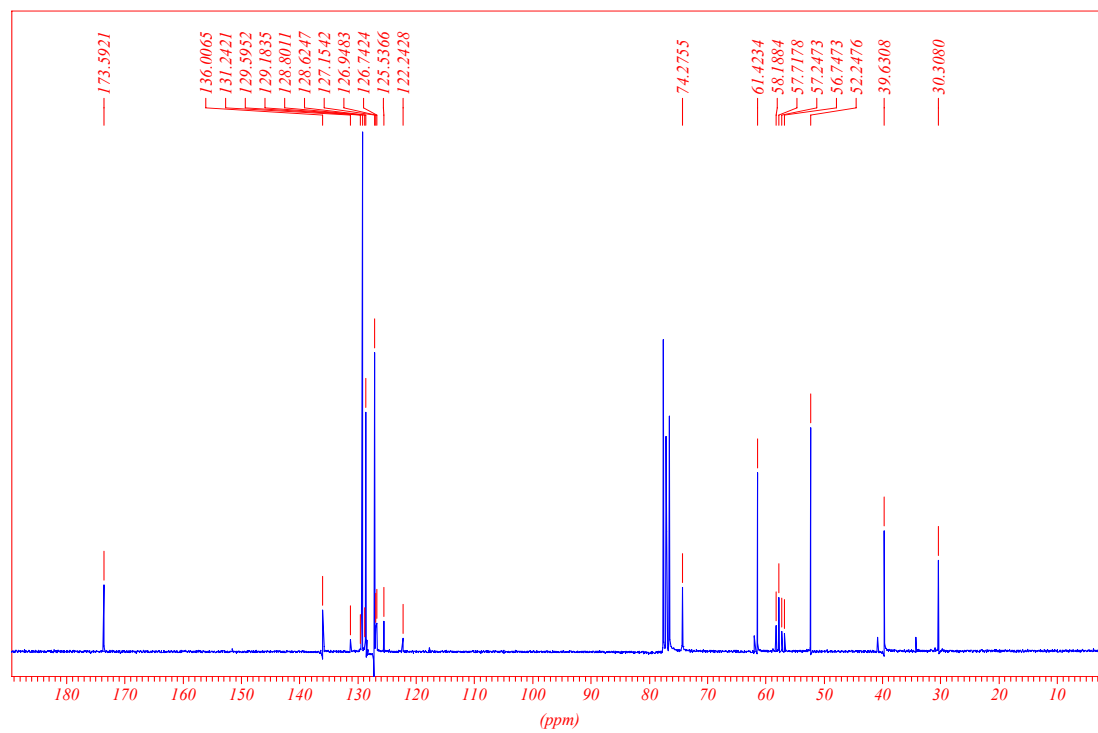

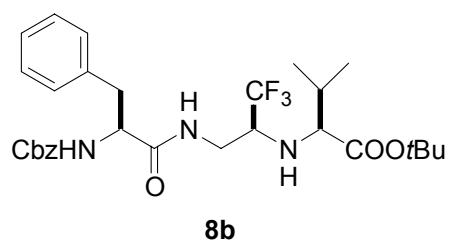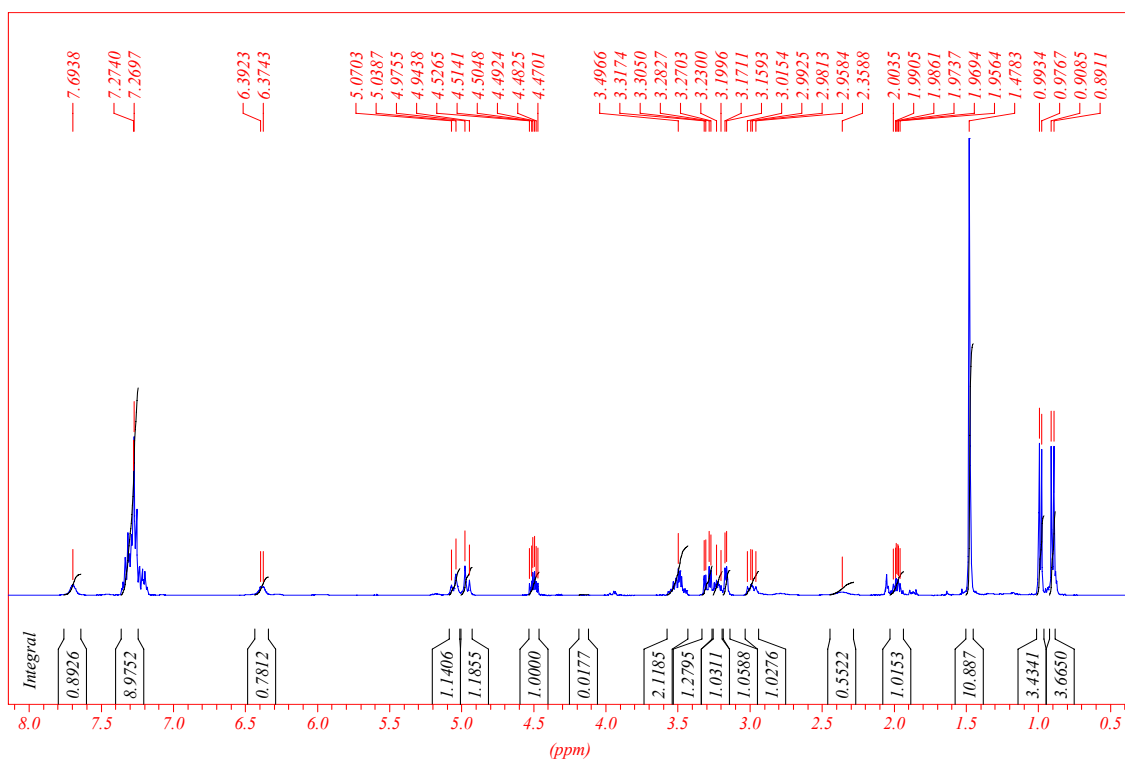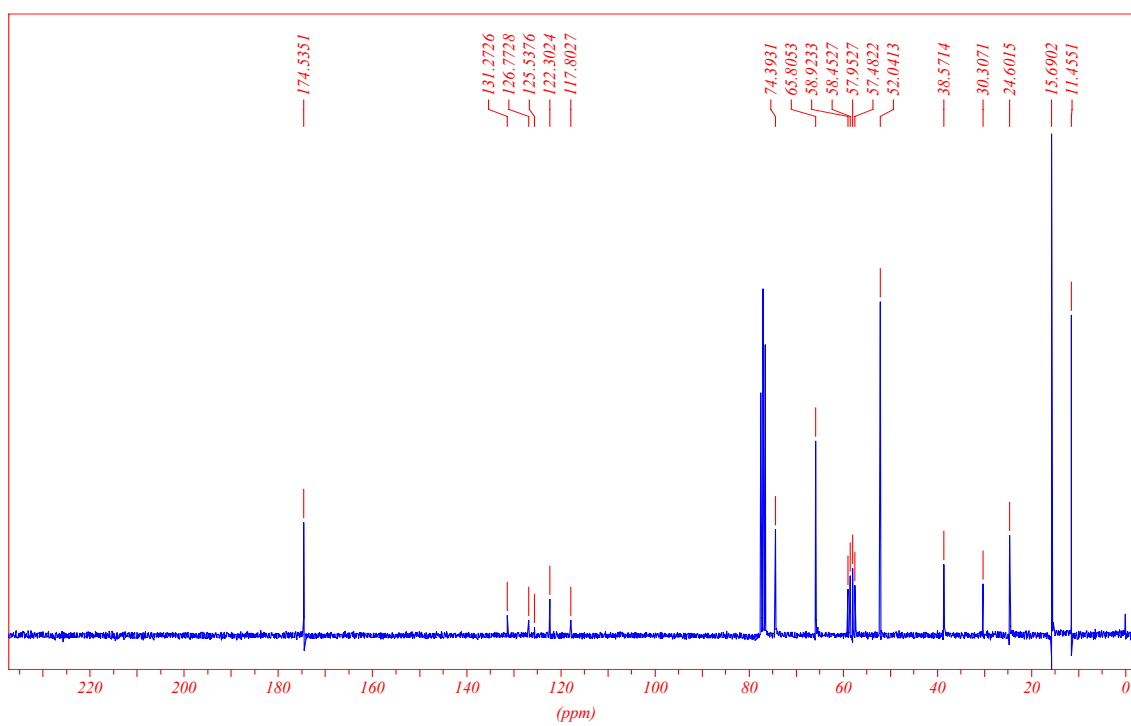

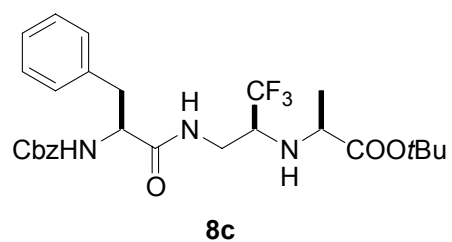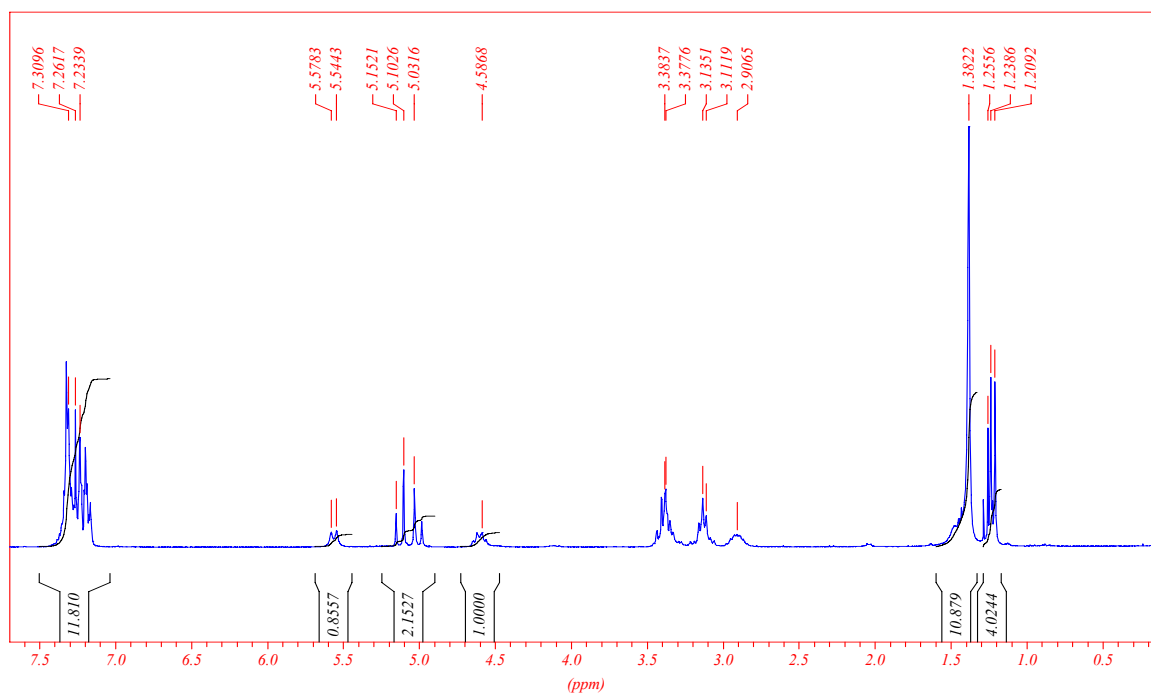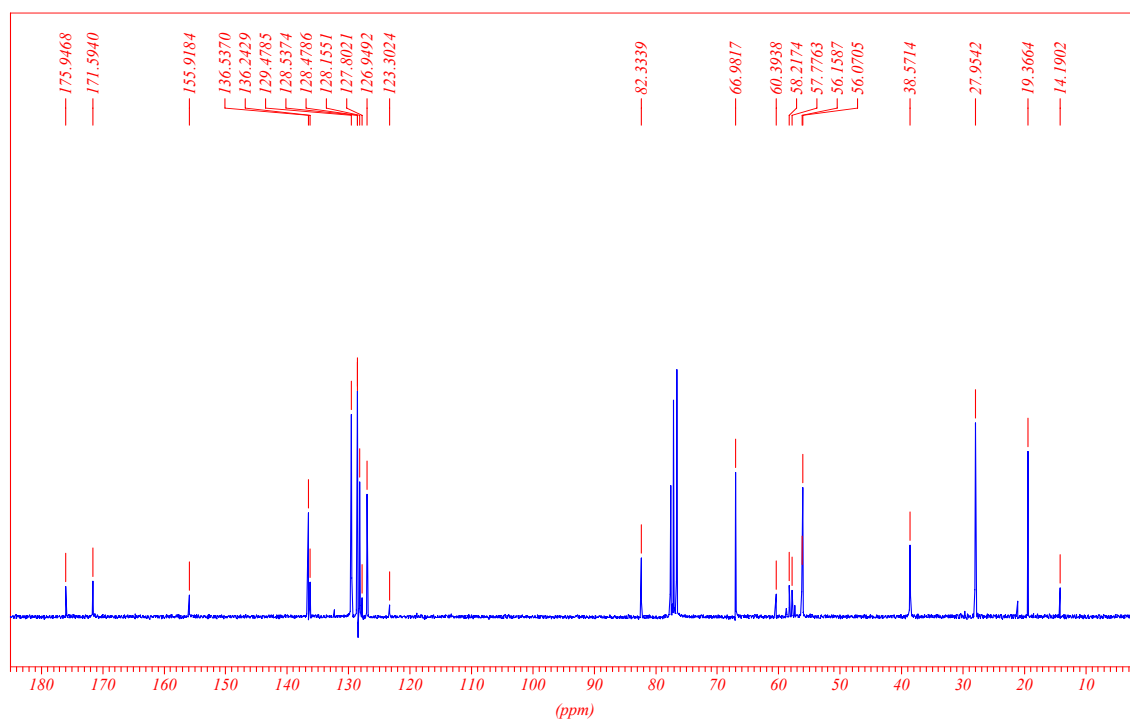

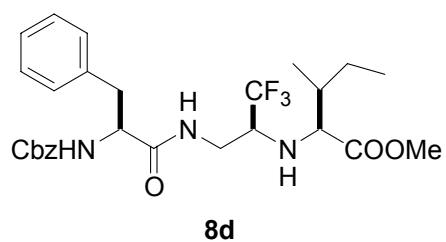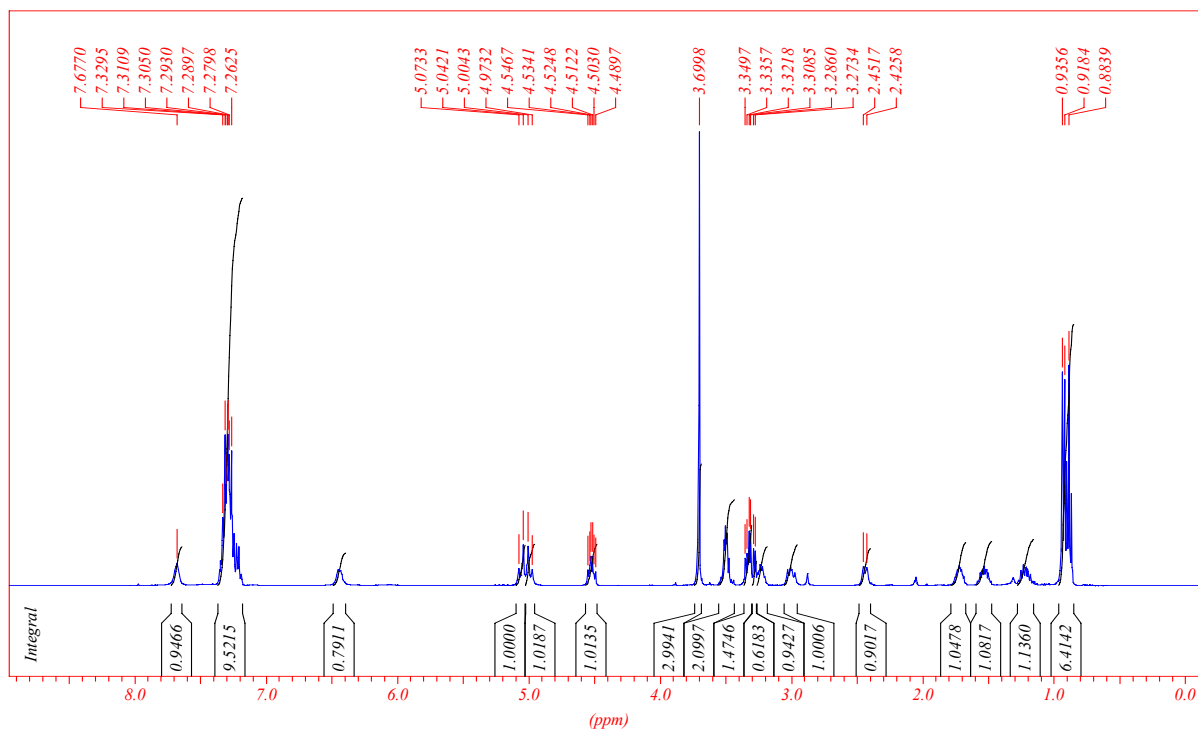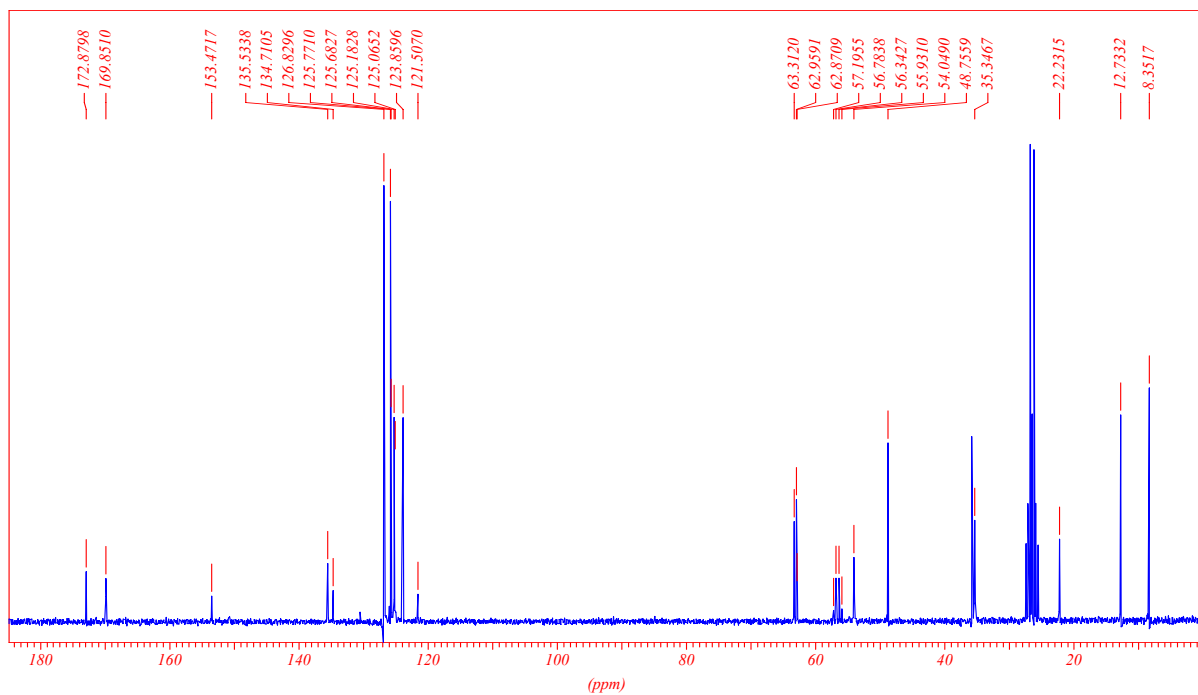



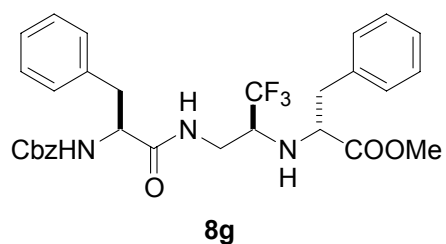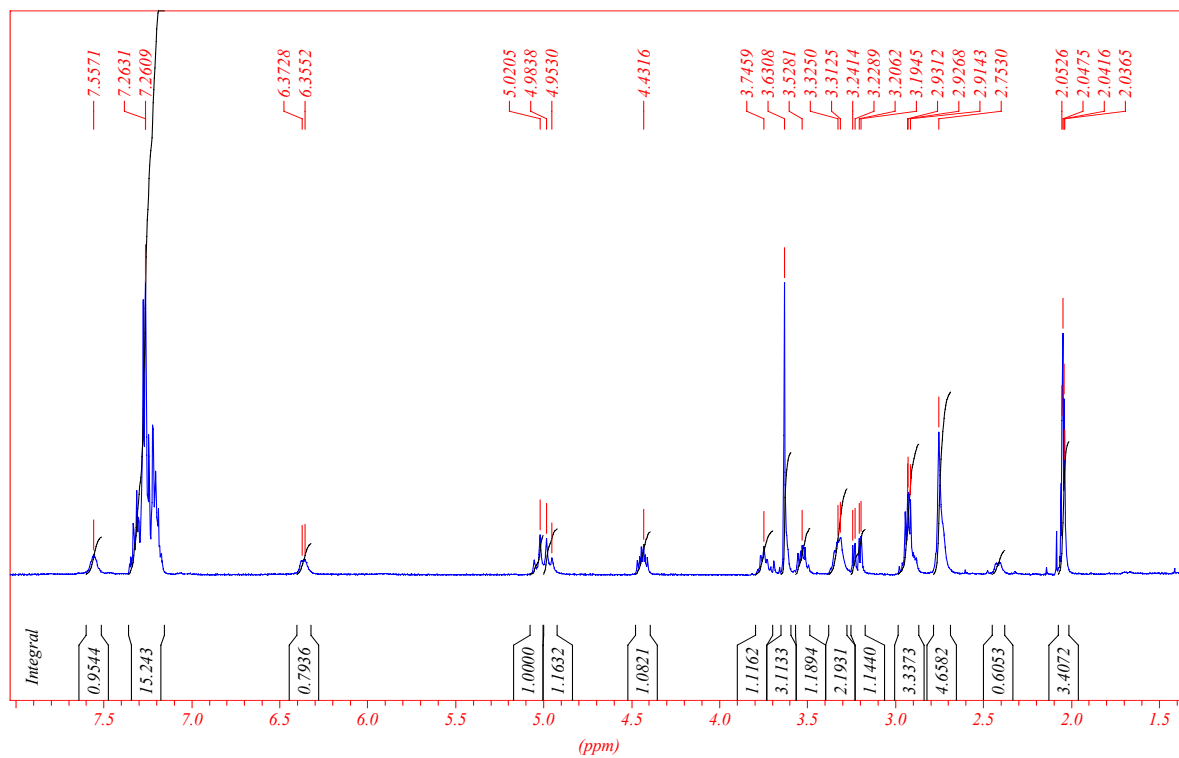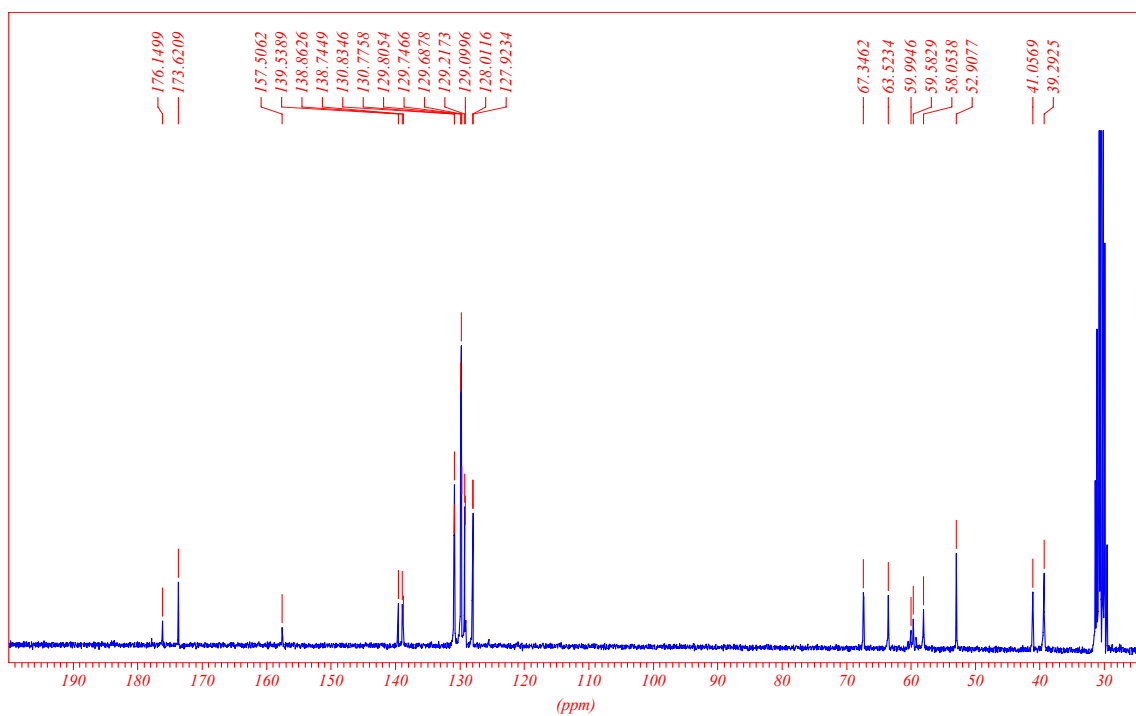

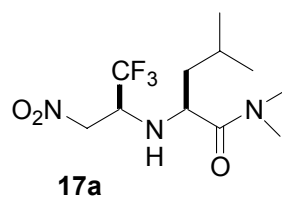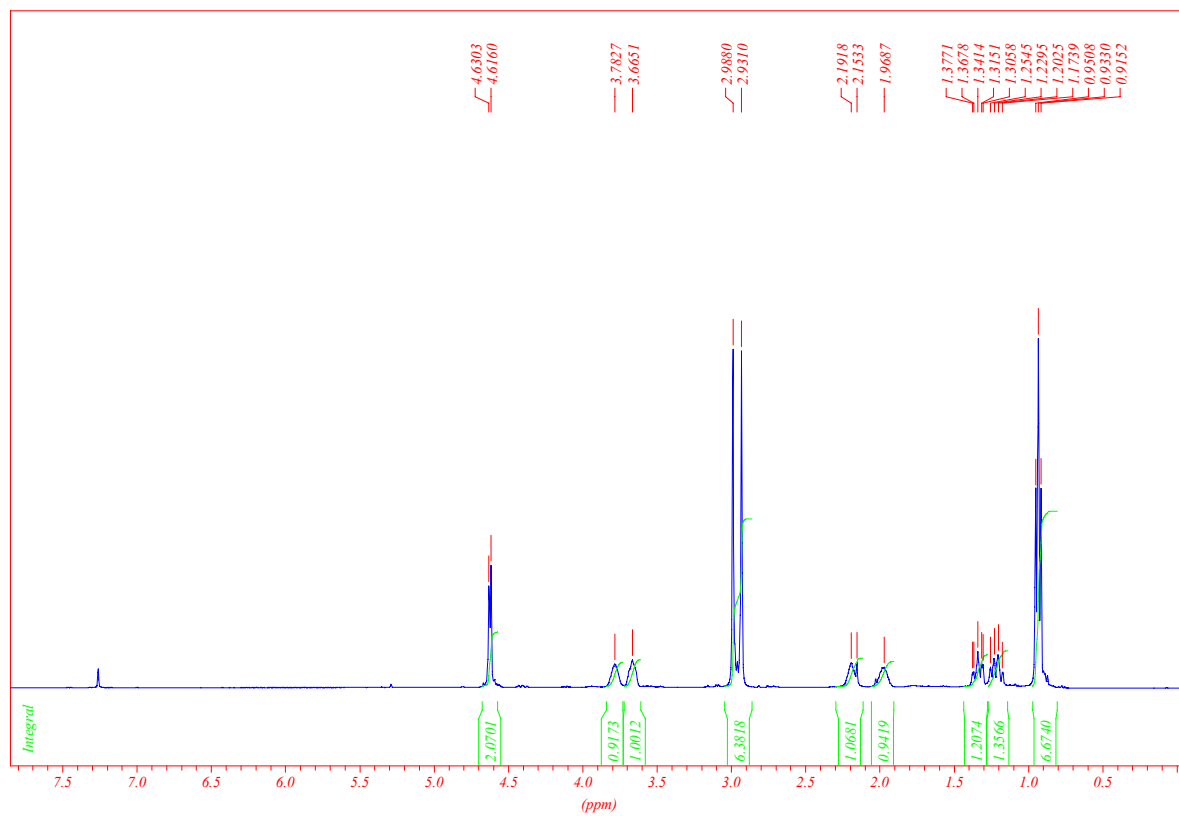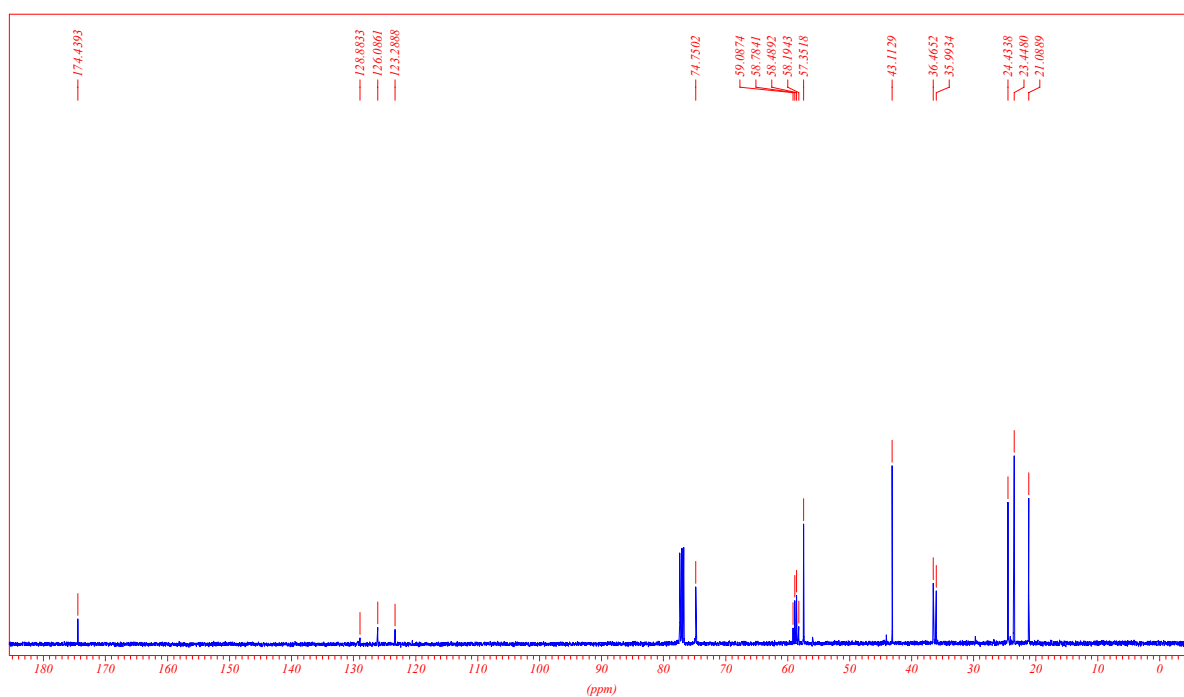

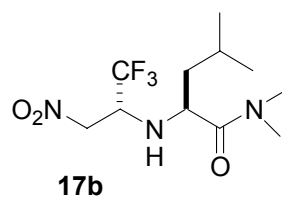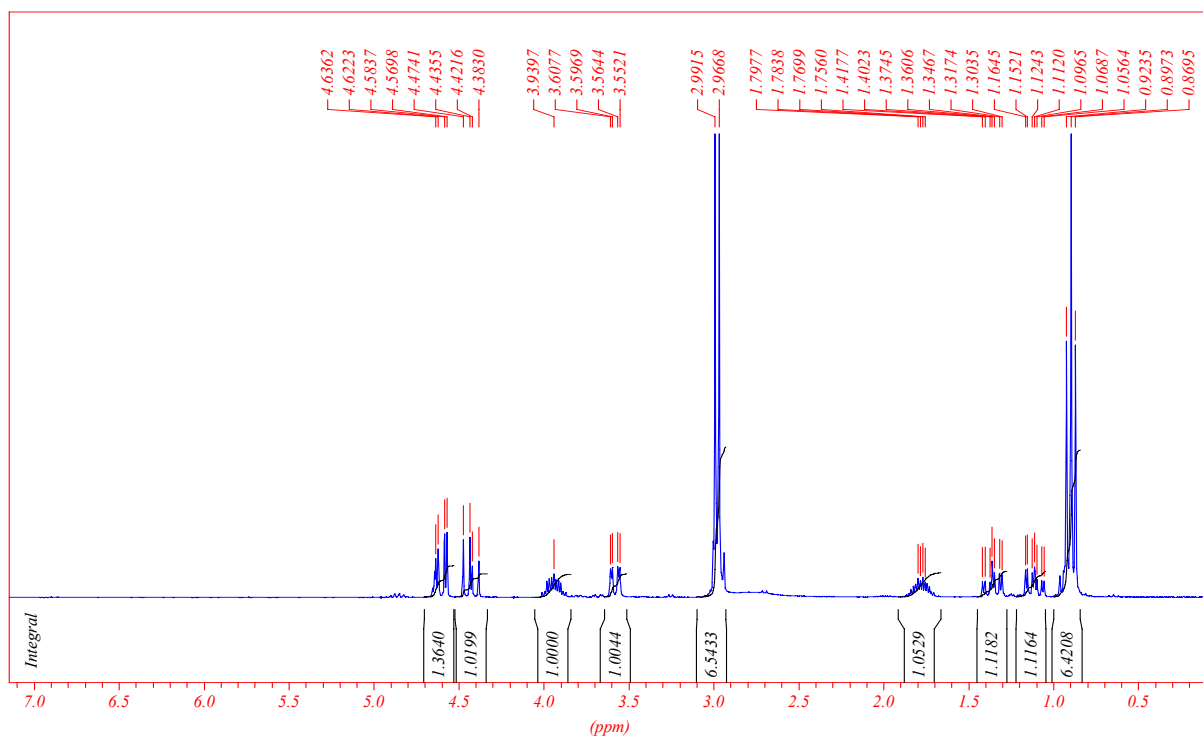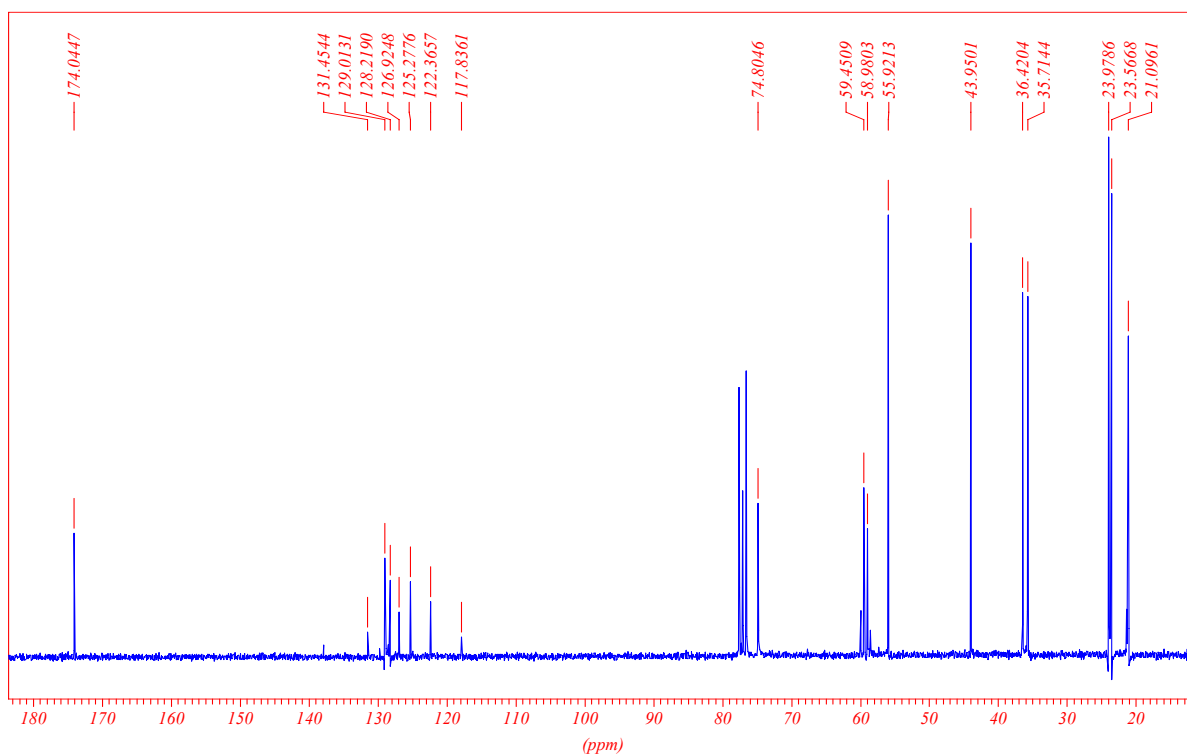

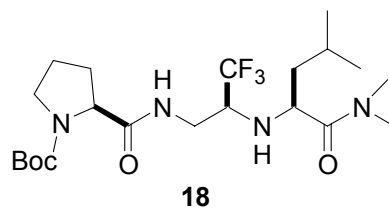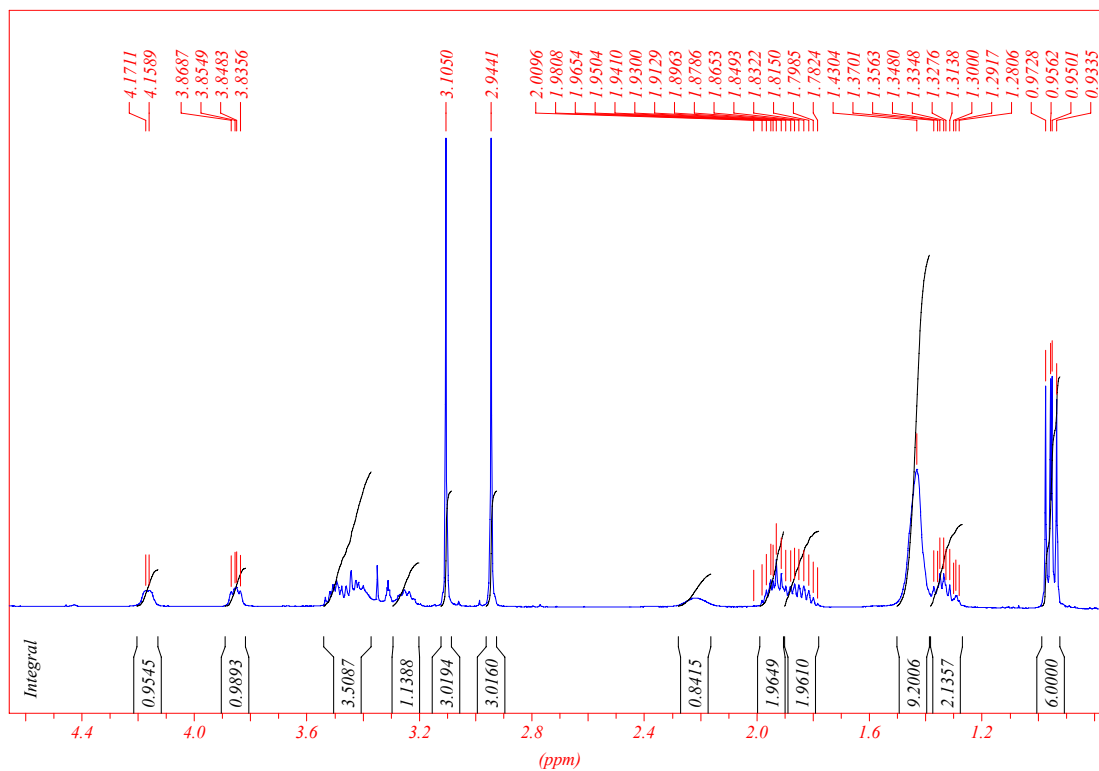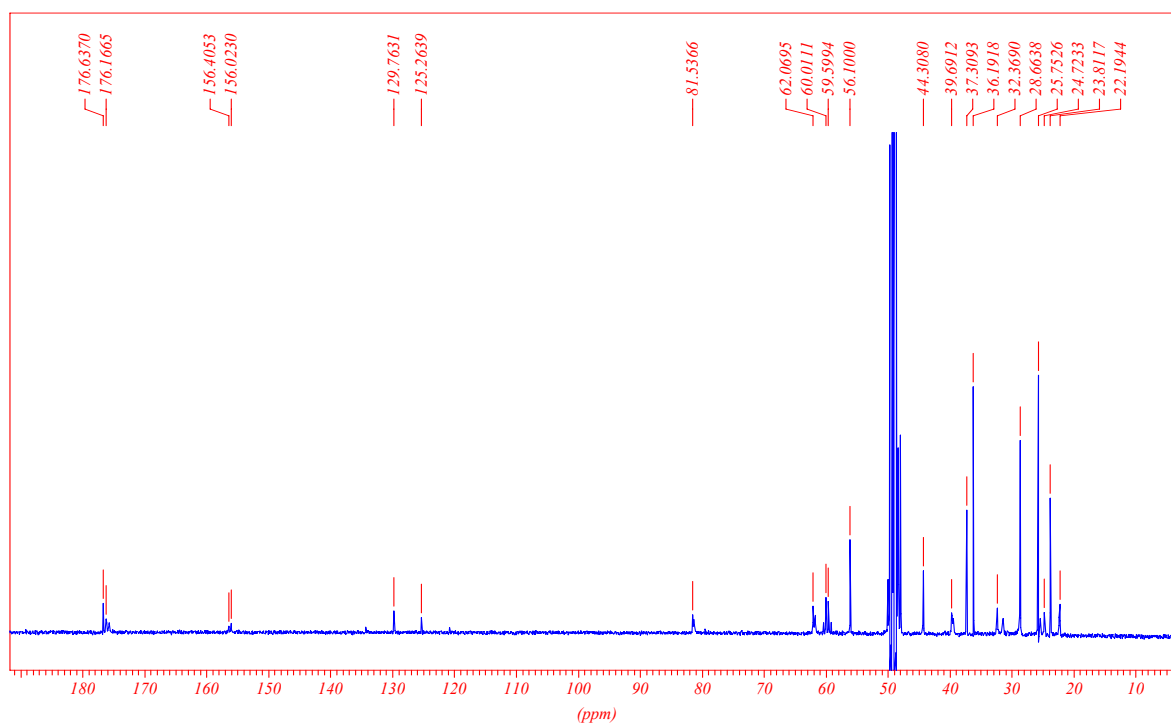

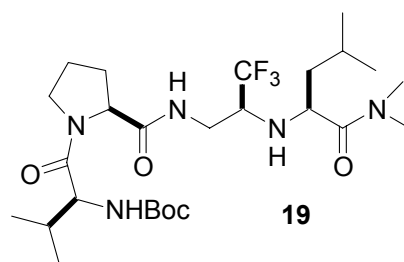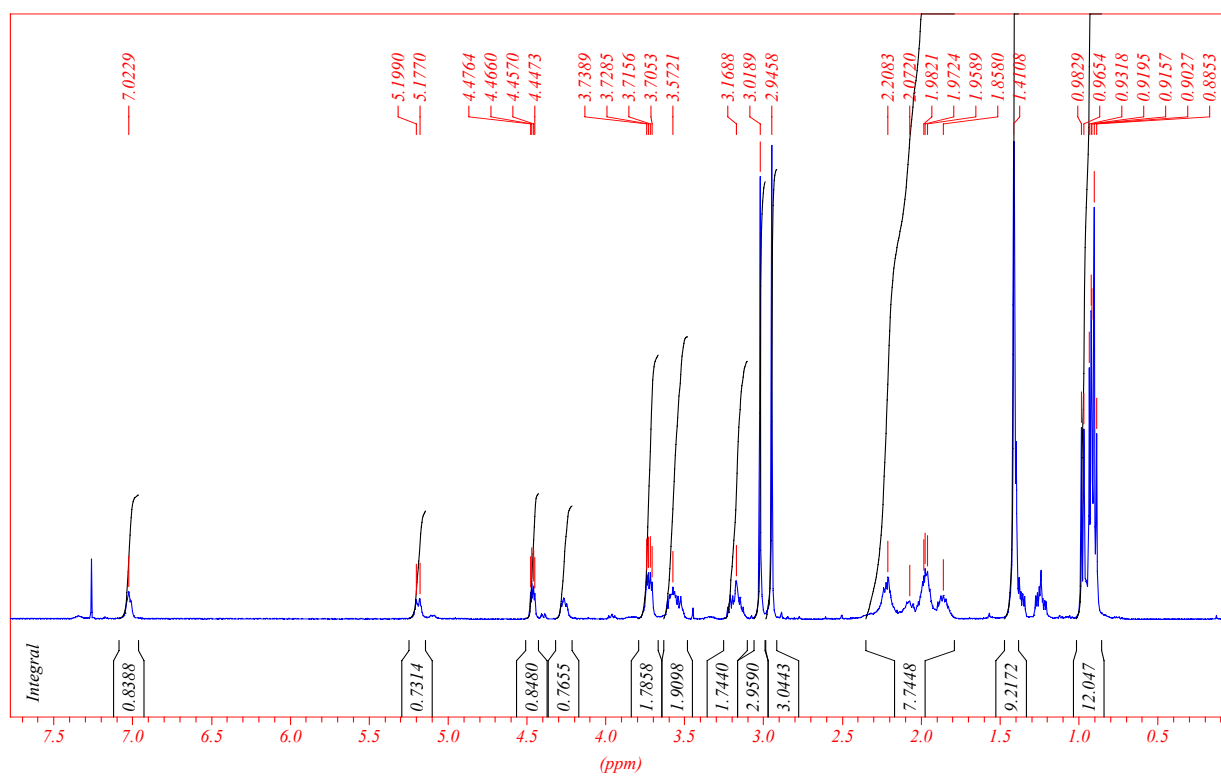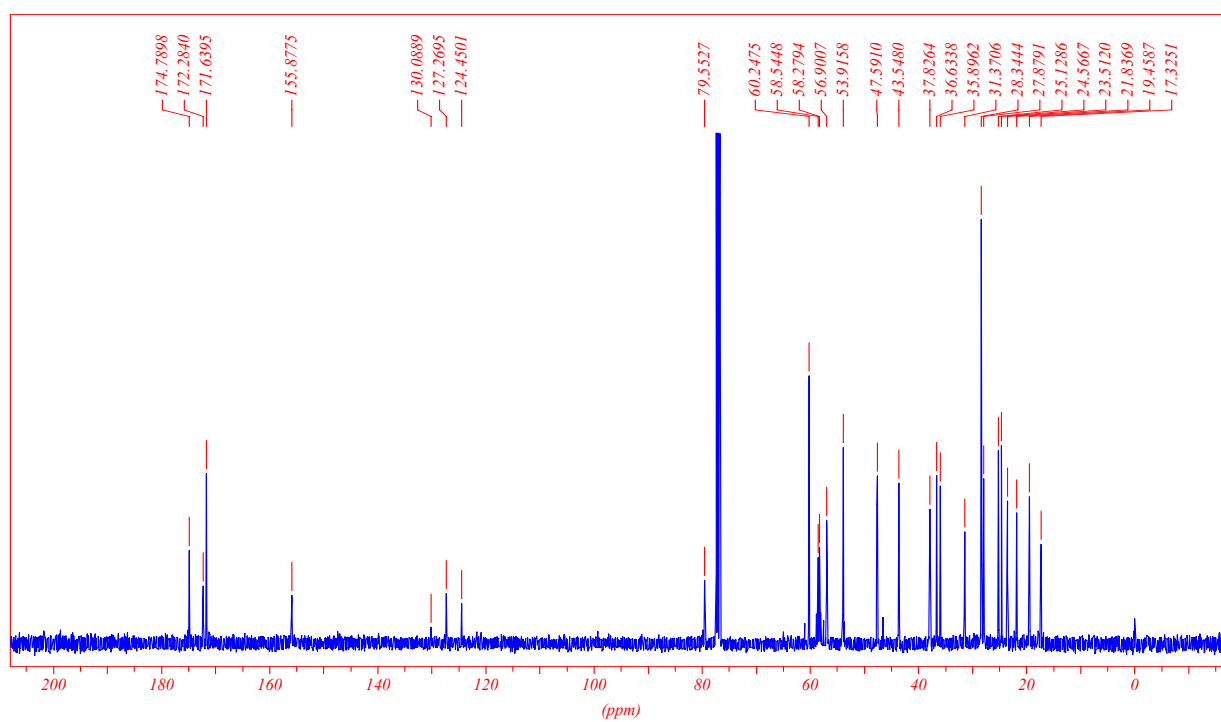

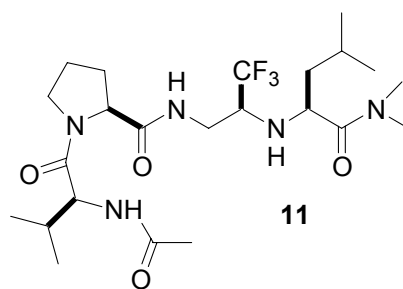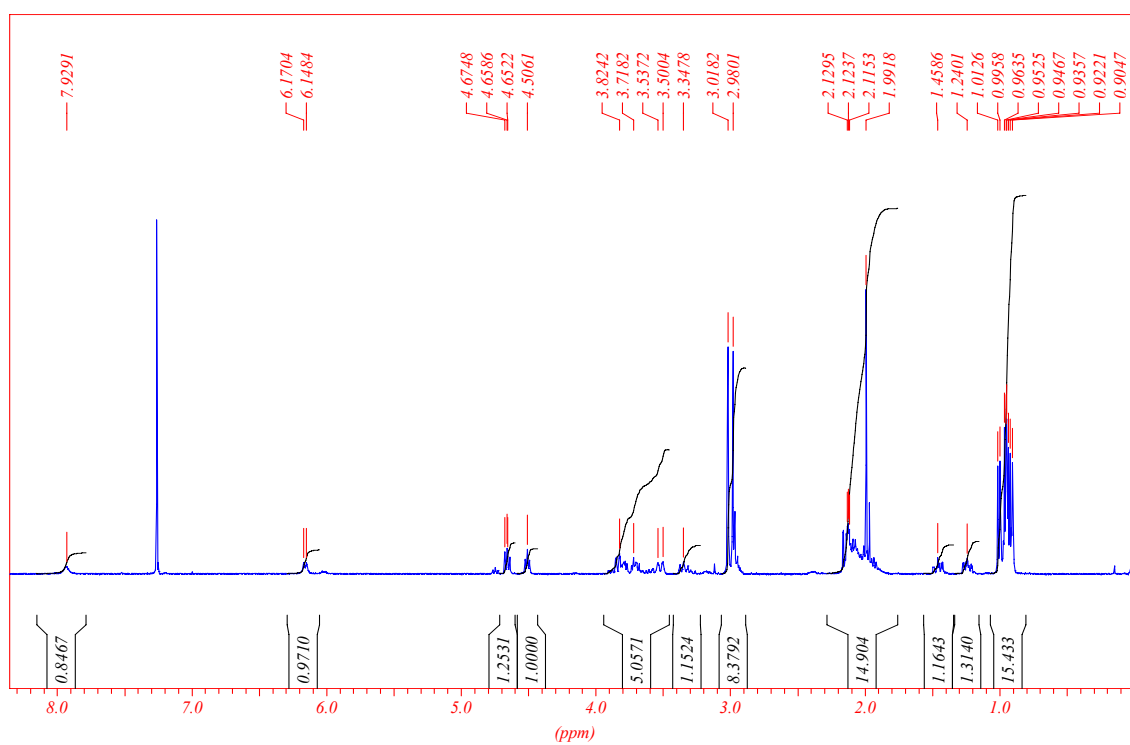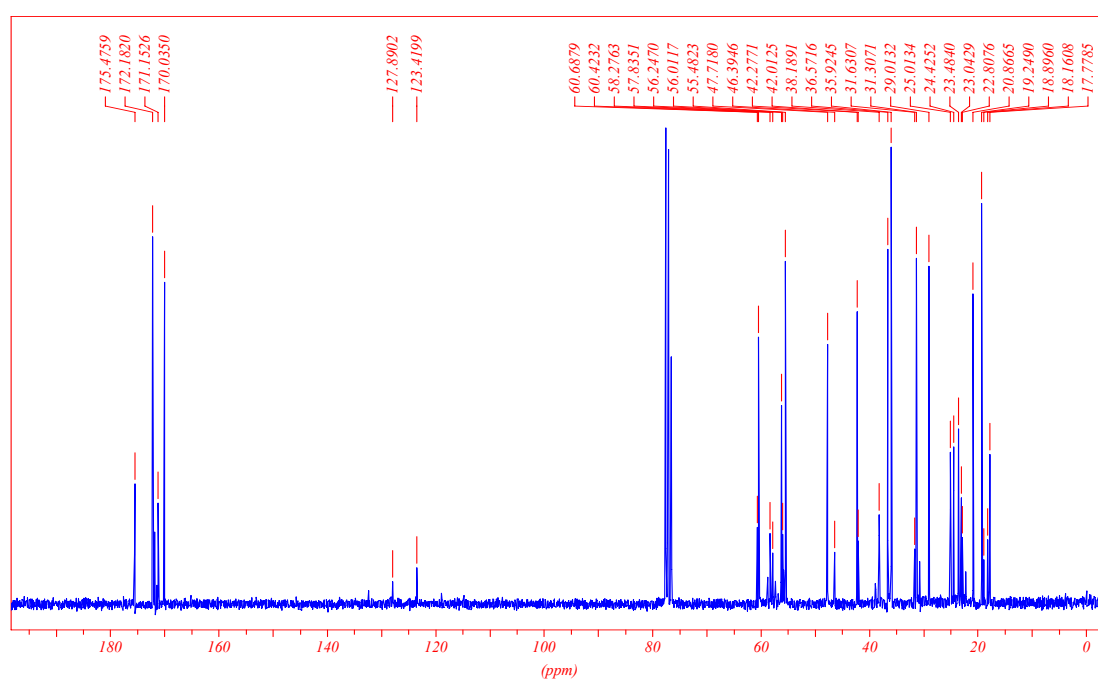

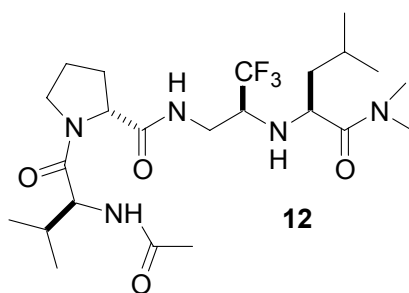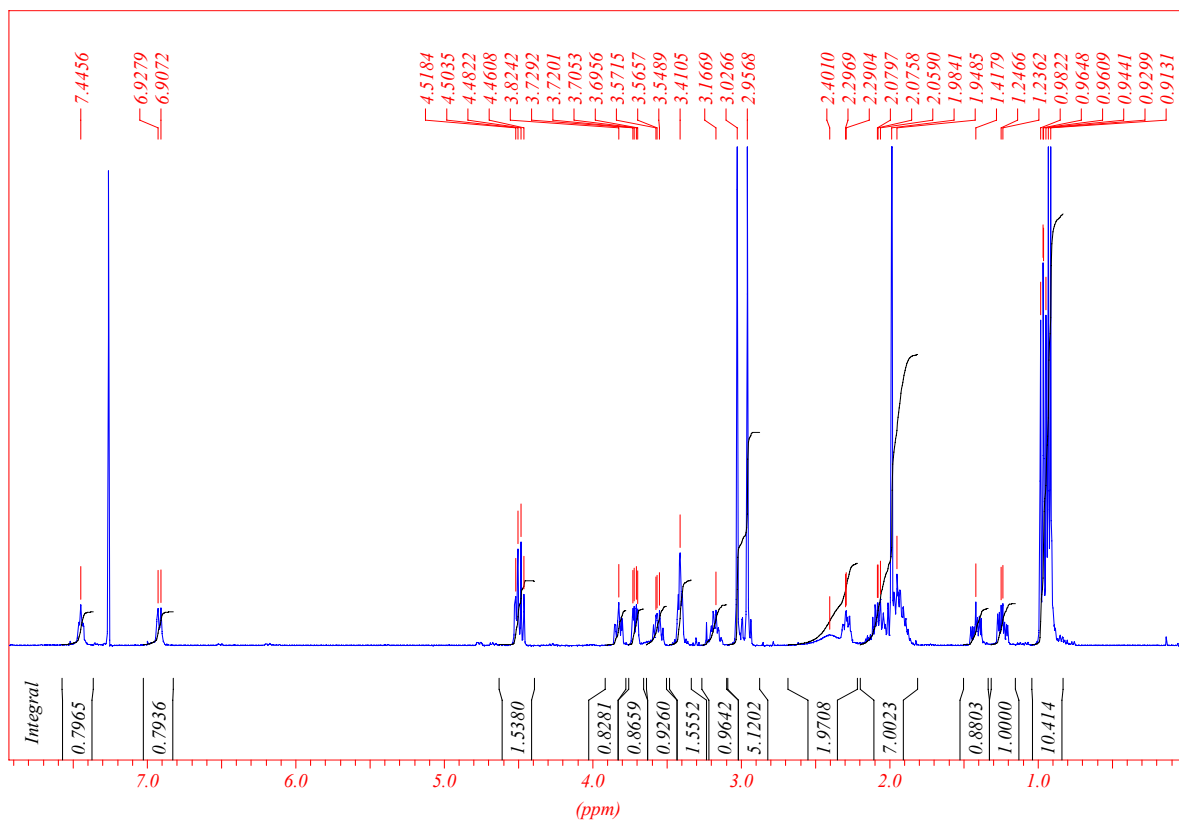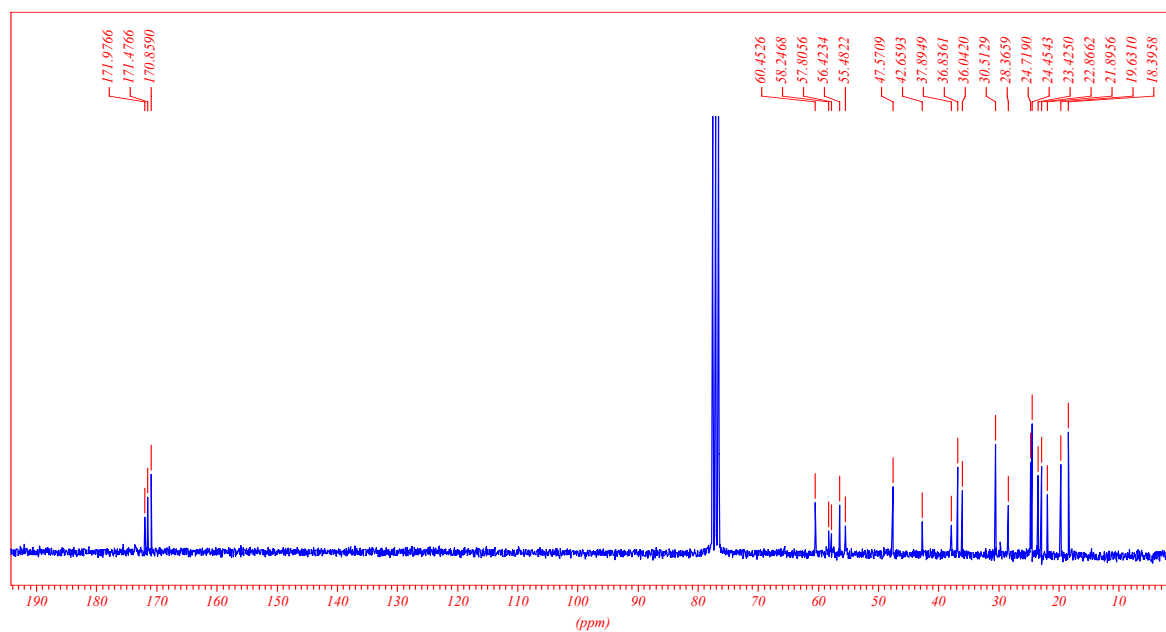

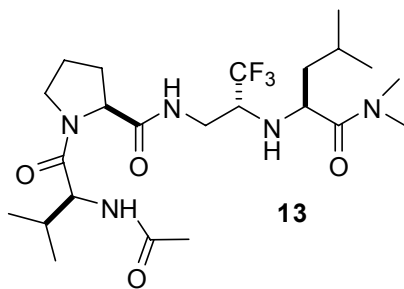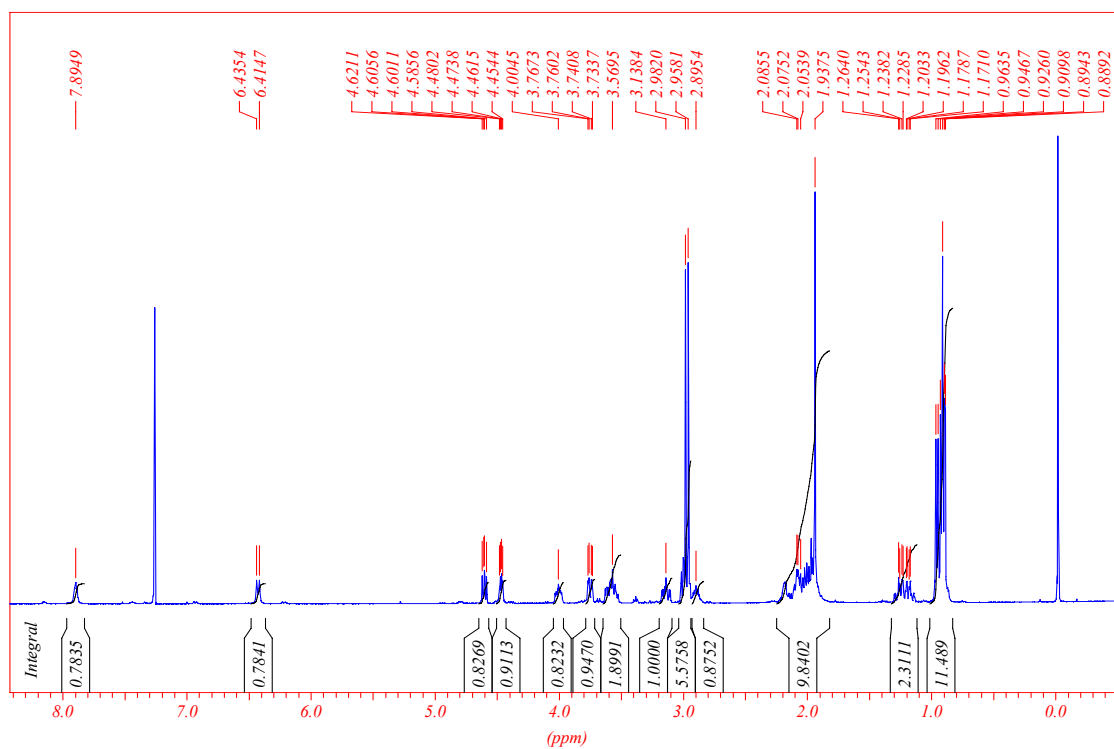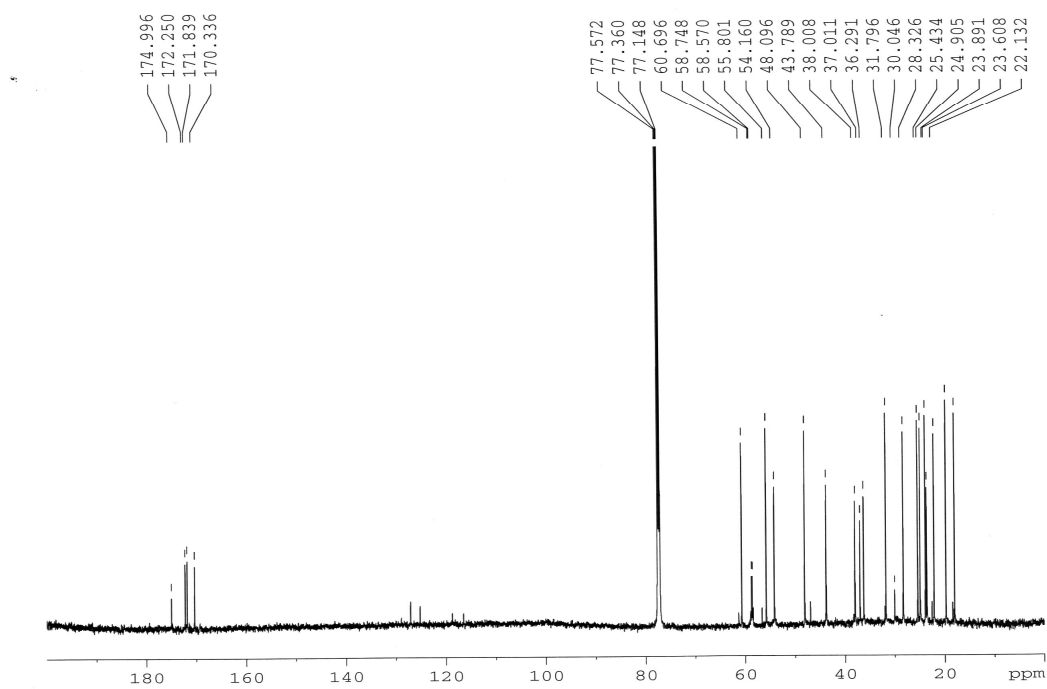



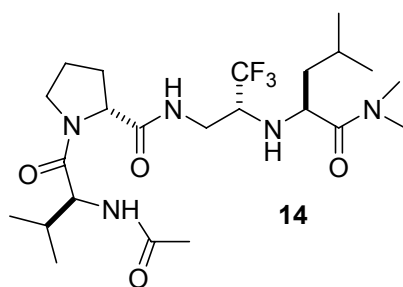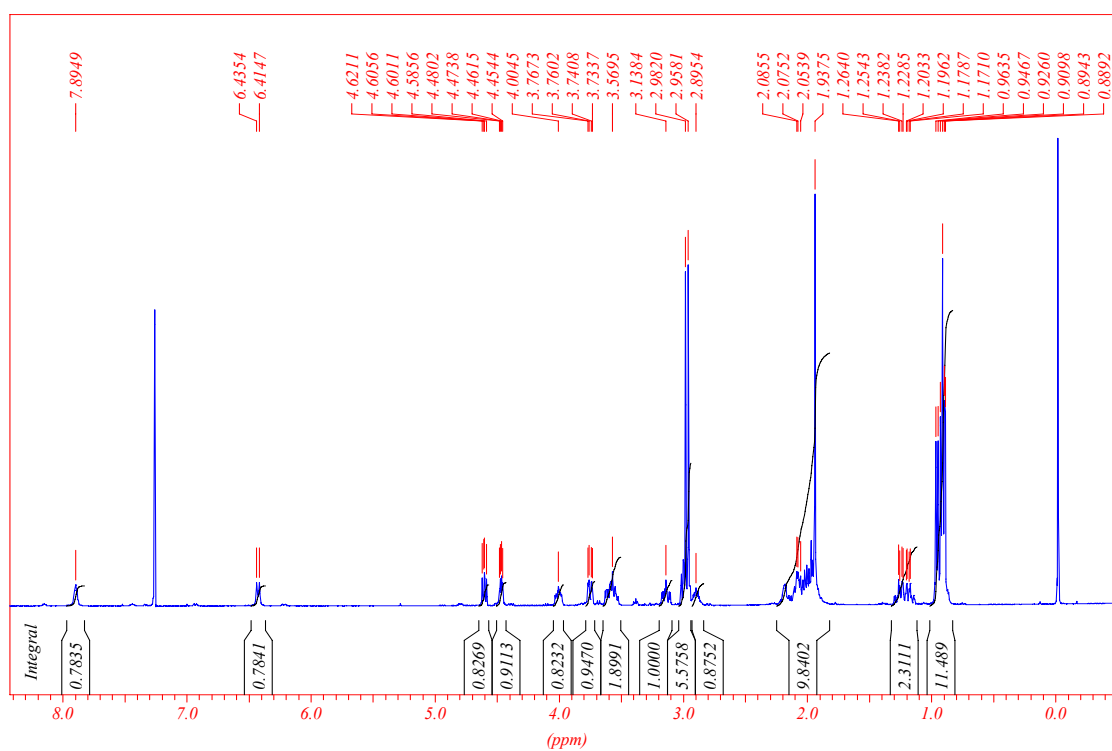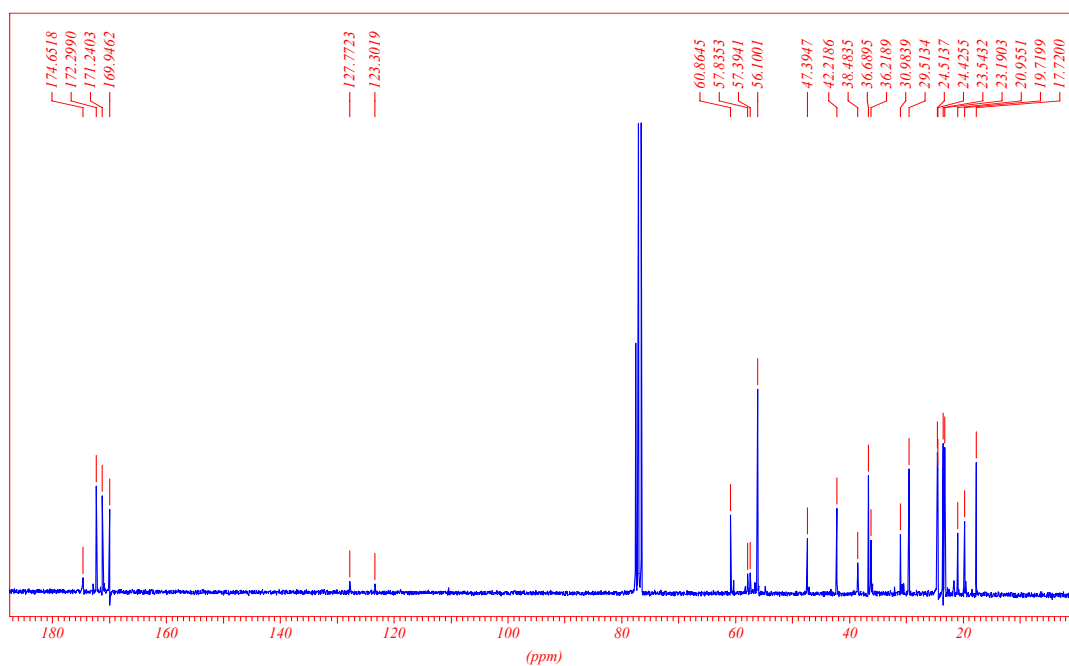

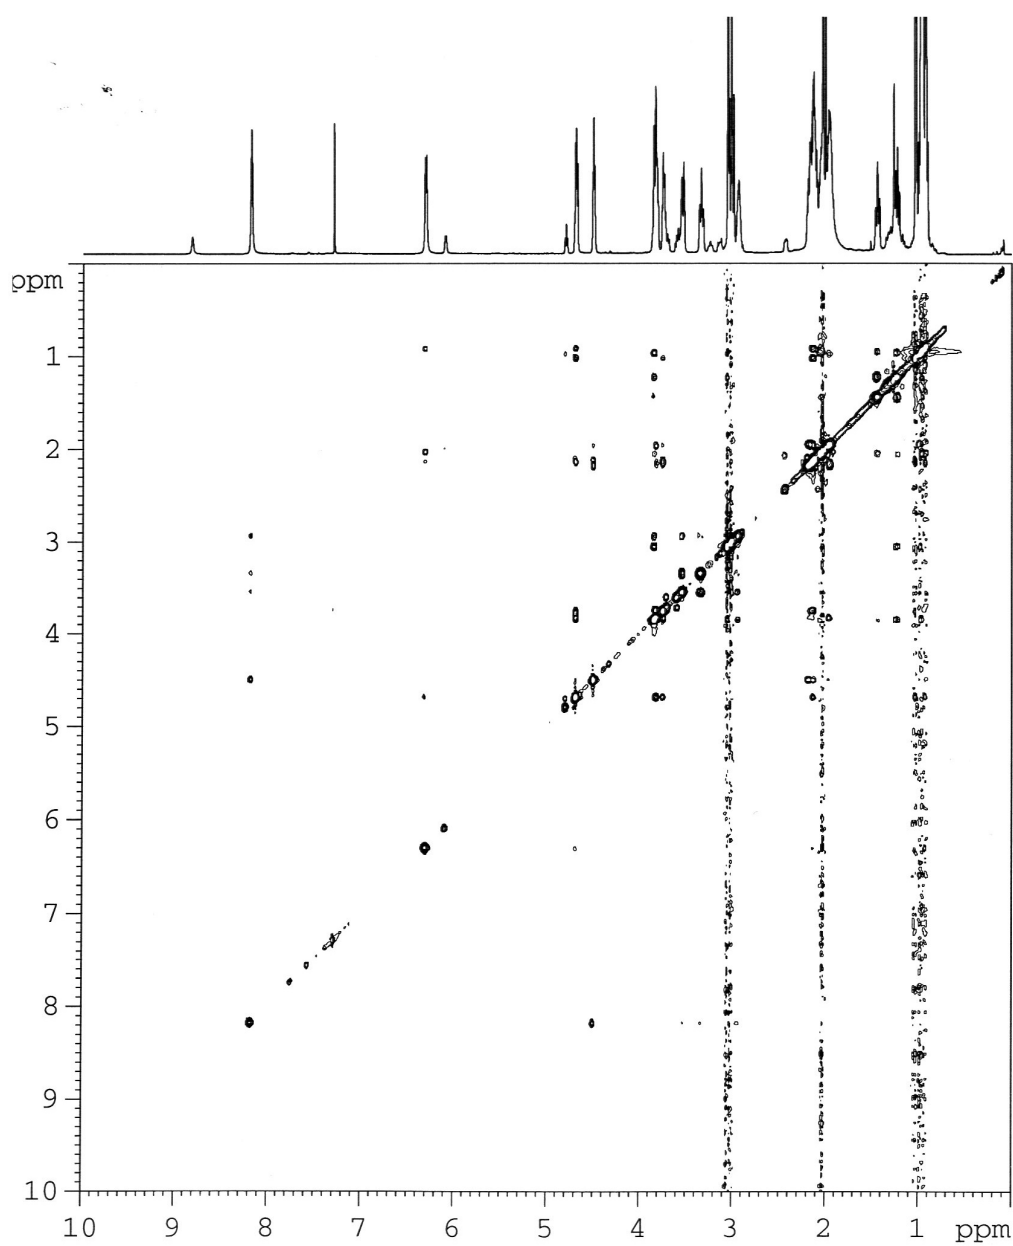

2D ROESY of **11** at 298 K

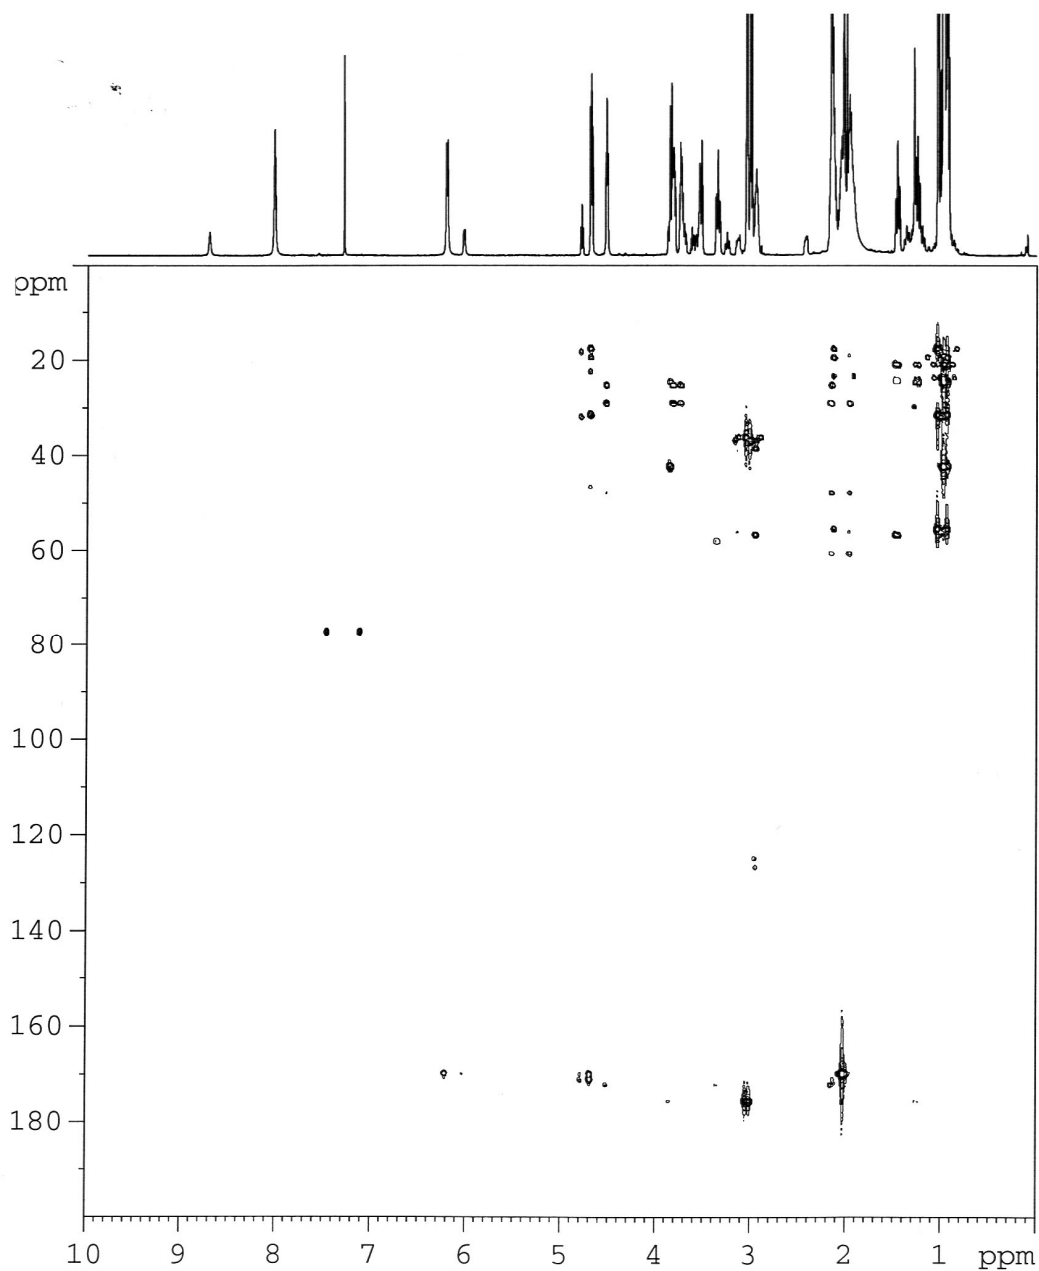

$^1\text{H}$ - $^{13}\text{C}$  2D HMBC of 11

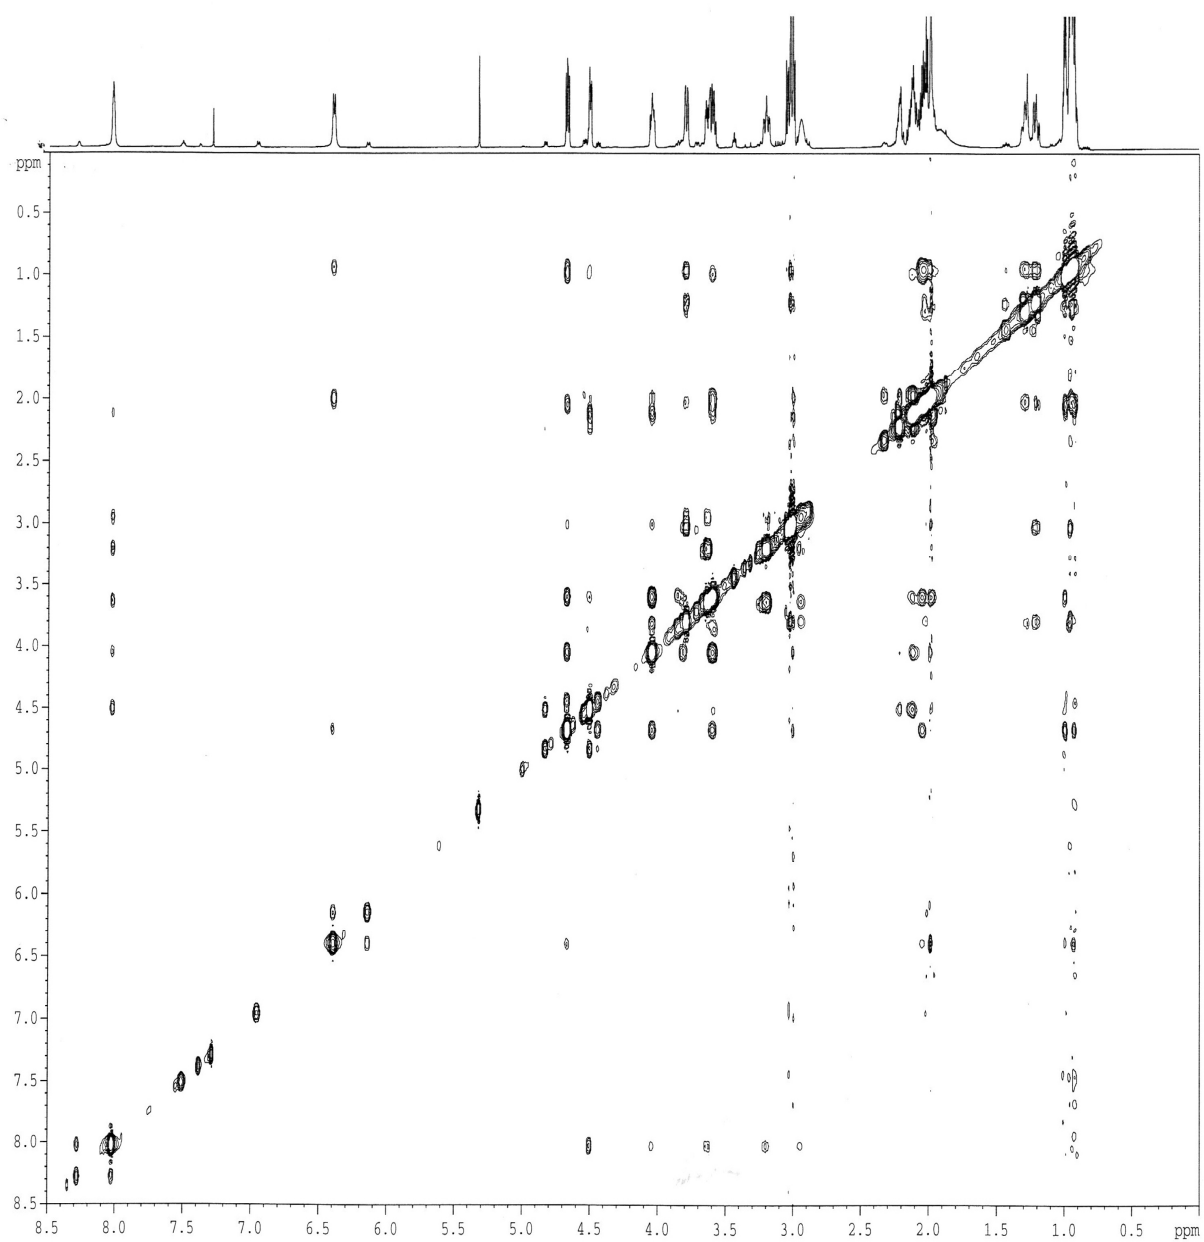

2D ROESY of **12** at 298 K

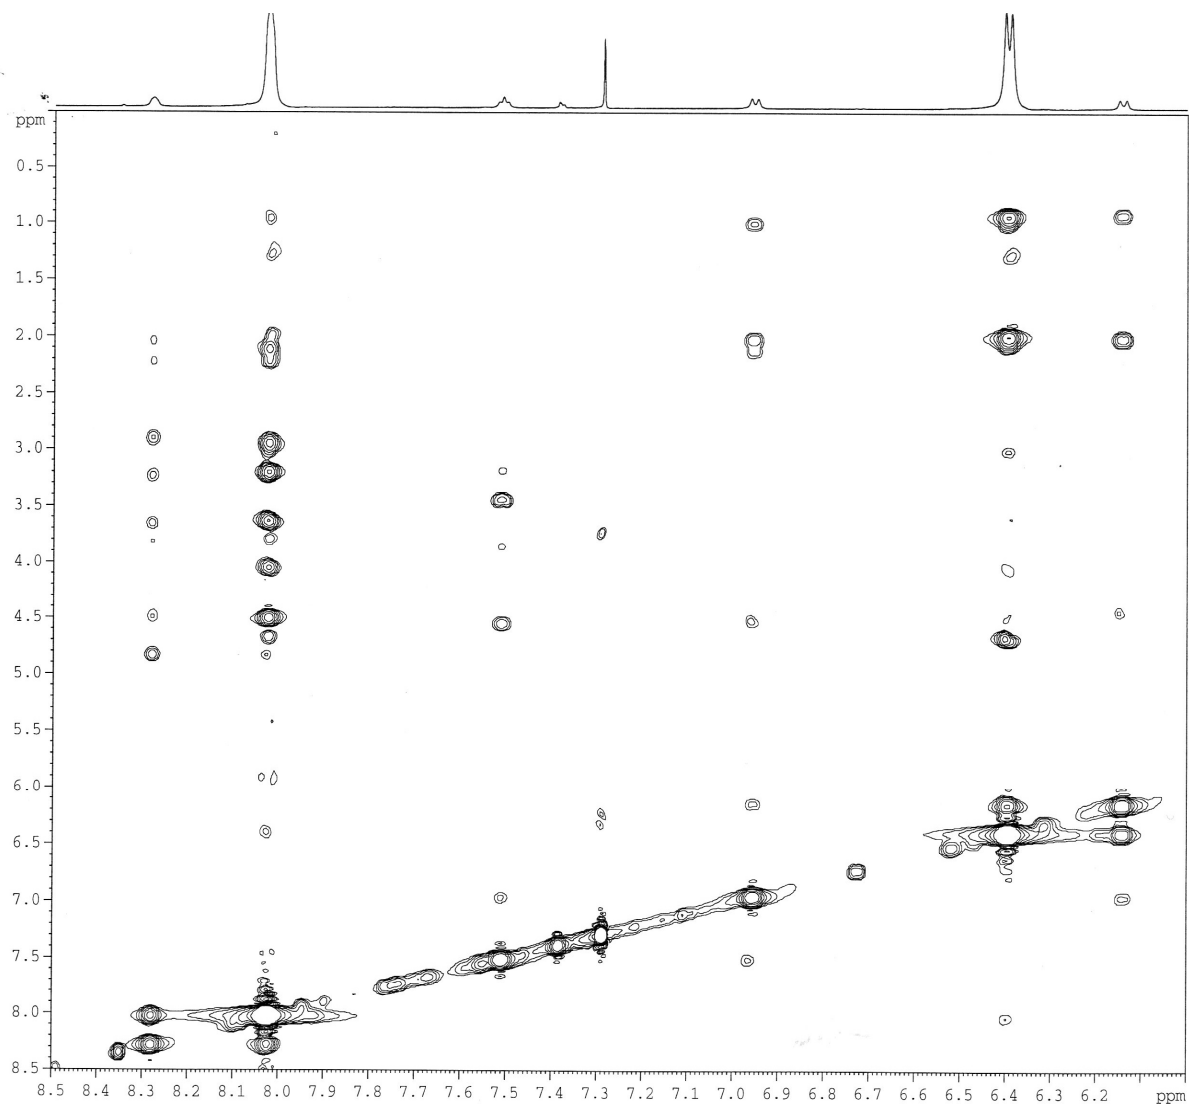

Expansion of the 2D ROESY of **12** at 298 K

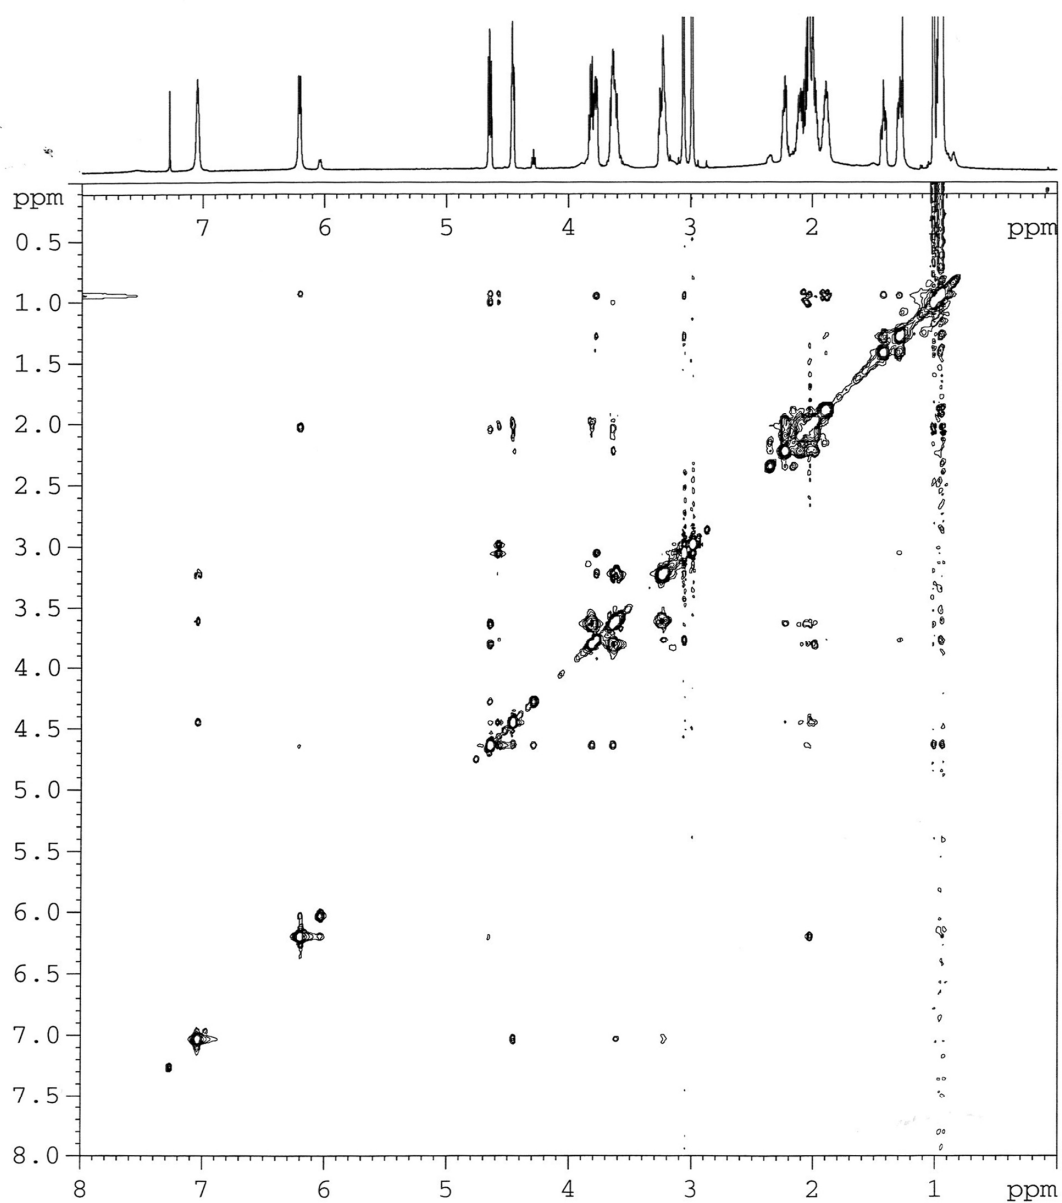

2D ROESY of **13** at 298 K

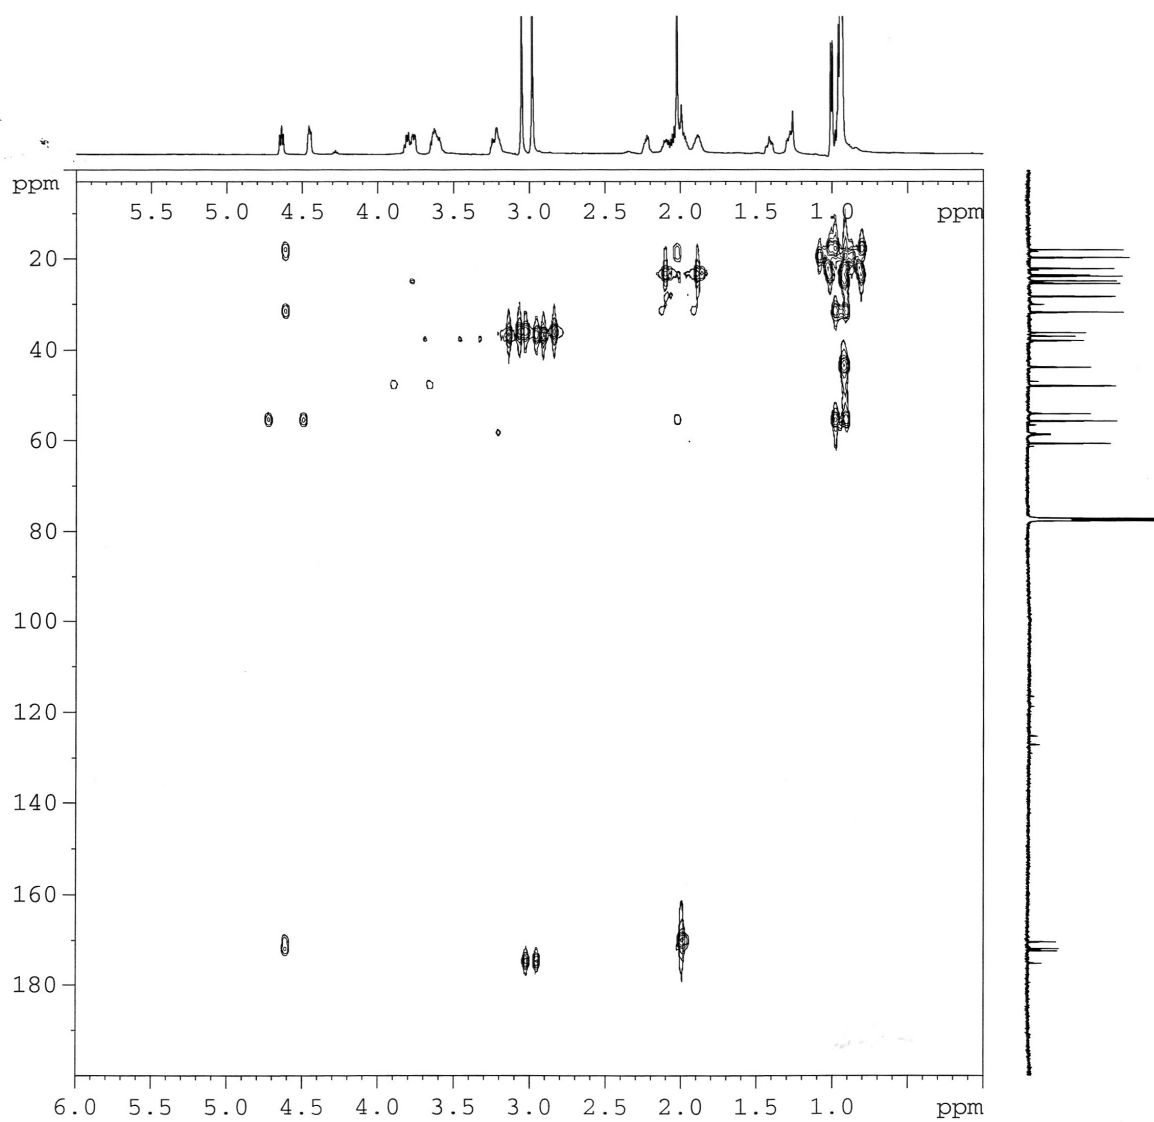

$^1\text{H}$ - $^{13}\text{C}$  2D HMBC of 13
